# Supplementary material for: Cryo-EM structures of remodeler-nucleosome intermediates suggest allosteric control through the nucleosome
Source: eLife journal article supplement (doi:10.7554/elife.46057), 2019-06-18

**volume 1**

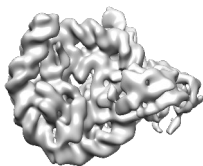

**volume 2**

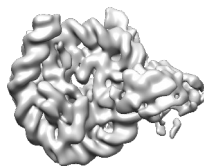

**volume 3**

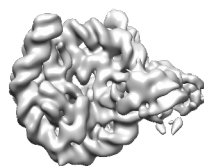

**volume 4**

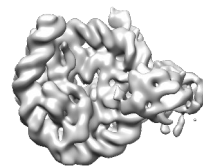

**volume 5**

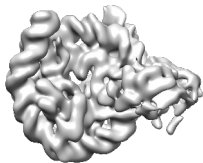

**volume 6**

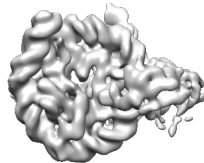

**volume 7**

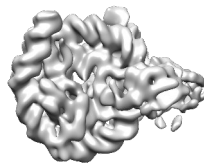

**volume 8**

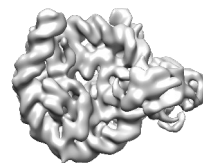

**volume 9**

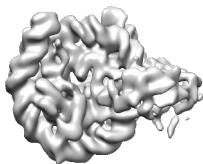

**volume 10**

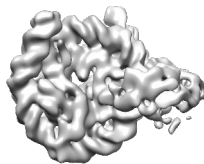

**volume 11**

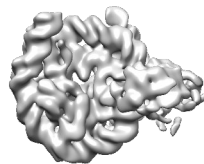

**volume 12**

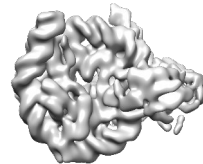

**volume 13**

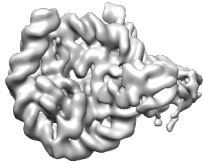

**volume 14**

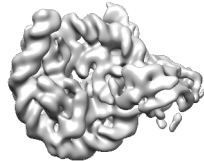

**volume 15**

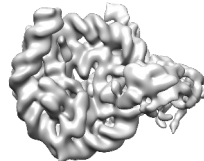

**volume 16**

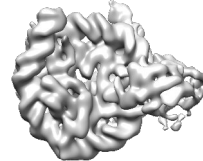

**volume 17**

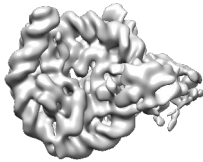

**volume 18**

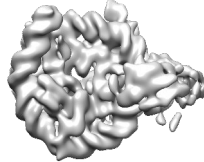

**volume 19**

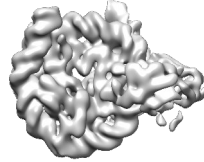

**volume 20**

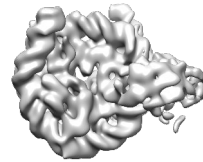

**variance map (orange)**

**sigma 2**

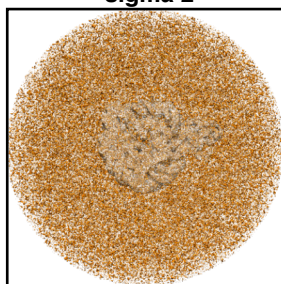

**sigma 3**

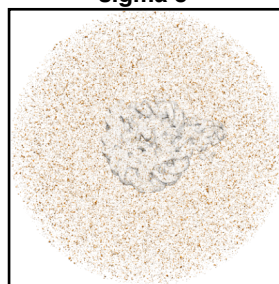

**sigma 4**

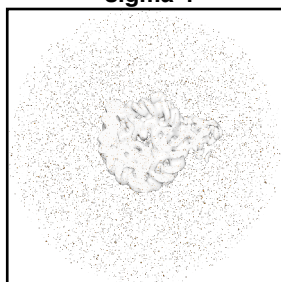

**sigma 5**

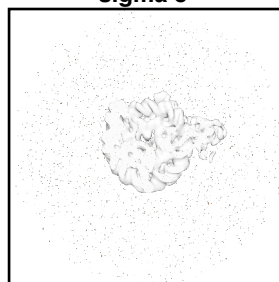

Supplement: supp [file elife-46057-supp-v1.zip › elife_poa_e46057_Figure_1_figure_supplement_6.pdf]
