# Supplementary material for: Cryo-EM structures of remodeler-nucleosome intermediates suggest allosteric control through the nucleosome
Source: eLife journal article supplement (doi:10.7554/elife.46057), 2019-06-18
Supplement: supp [file elife-46057-supp-v1.zip]

Archive with 21 entries (21 files):
- elife_poa_e46057_Figure_3_figure_supplement_6.pdf
- elife_poa_e46057_Figure_2_figure_supplement_3.pdf
- elife_poa_e46057_Figure_3_figure_supplement_1.pdf
- elife_poa_e46057_Figure_1_figure_supplement_2.pdf
- elife_poa_e46057_Figure_3_figure_supplement_2.pdf
- elife_poa_e46057_Figure_1_figure_supplement_1.pdf
- elife_poa_e46057_Figure_4_source_data_1.xlsx
- elife_poa_e46057_Figure_2_figure_supplement_1.pdf
- elife_poa_e46057_Figure_1_figure_supplement_3.pdf
- elife_poa_e46057_Transparent_Reporting_File.docx
- elife_poa_e46057_Figure_3_figure_supplement_3.pdf
- elife_poa_e46057_Figure_2_figure_supplement_2.pdf
- elife_poa_e46057_Figure_3_figure_supplement_5_source_data_1.xlsx
- elife_poa_e46057_Figure_1_figure_supplement_5.pdf
- elife_poa_e46057_Figure_1_figure_supplement_3_source_data_1.xlsx
- elife_poa_e46057_Figure_3_source_data_1.xlsx
- elife_poa_e46057_Figure_3_figure_supplement_4.pdf
- elife_poa_e46057_Figure_3_figure_supplement_5.pdf
- elife_poa_e46057_Supplementary_file_1.docx
- elife_poa_e46057_Figure_1_figure_supplement_4.pdf
- elife_poa_e46057_Figure_1_figure_supplement_6.pdf
