# Supplementary material for: Cryo-EM structures of remodeler-nucleosome intermediates suggest allosteric control through the nucleosome
Source: eLife journal article supplement (doi:10.7554/elife.46057), 2019-06-18
Supplement: supp [file elife-46057-supp-v1.zip › elife_poa_e46057_Figure_1_figure_supplement_3_source_data_1.xlsx]

## Sheet: Sheet1
	Panel D
		Time (min)	ADP•BeFx•Mg 140mM KCl				ADP•BeFx•Mg 70 mM KCl			No Enzyme
		0	1	1	1	1	1	1	1	1	1	1	Normalized FRET Efficiency
		1	0.874647	0.949548	0.894938	0.883798	0.93559	0.949945	0.873856	0.951746	0.991273	0.974721
		3	0.932203	0.9919	0.923055	0.881956	0.900402	0.898673	0.877263	0.934924	1.01055	0.982509
		5	0.926315	0.983755	0.945914	0.914163	0.906095	0.900119	0.864196	0.952896	0.98757	0.961114
		10	0.927325	1.00884	0.988435	0.92635	0.894109	0.90196	0.864131	0.924999	0.973777	0.96931
		15	0.947851	1.02114	0.972348	0.952049	0.925375	0.907549	0.877409	0.930464	1.0077	1.00203
		20	0.97794	1.01925	0.976645	0.933217	0.942115	0.896778	0.897993	0.937908	0.969554	1.00703
		25	0.936723	1.03238	0.982138	0.942505	0.941524	0.908564	0.876842	0.908275	0.996846	0.96844
		30	0.920204	1.04287	0.986148	0.937066	0.923361	0.915548	0.875746	0.920656	0.995693	0.984529
		35	0.951339	1.05149	0.988283	0.947429	0.935124	0.911479	0.876673
		40	0.928259	1.01935	0.985626	0.948911	0.919917	0.897415	0.871597	0.910248	0.952043	0.957763
		50					0.910905	0.902622	0.876909
		60	0.946678	1.01005	0.973747	0.918883				0.901786	0.990514	0.962044
