# Supplementary material for: Cryo-EM structures of remodeler-nucleosome intermediates suggest allosteric control through the nucleosome
Source: eLife journal article supplement (doi:10.7554/elife.46057), 2019-06-18

**A*****Homo sapiens* SNF2h (ISWI)**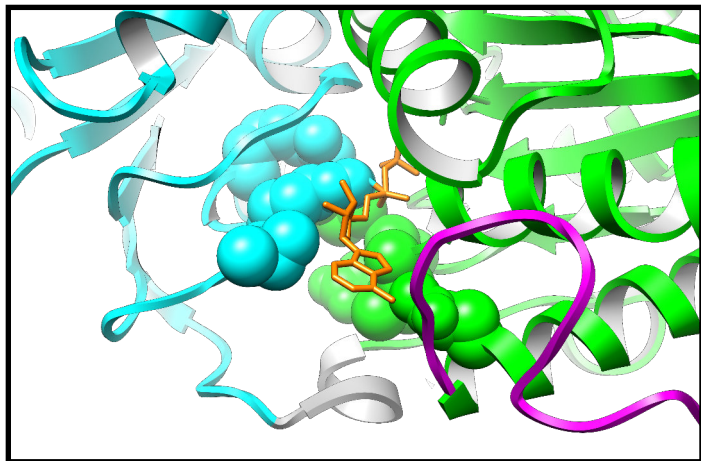***Saccharomyces cerevisiae* Swi2/Snf2**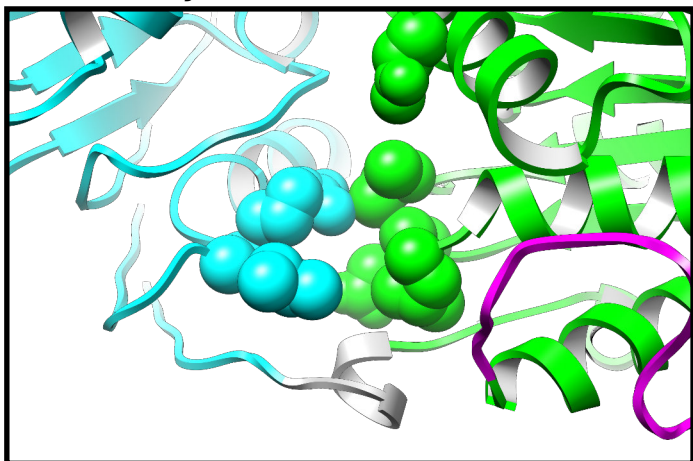***Saccharomyces cerevisiae* CHD1**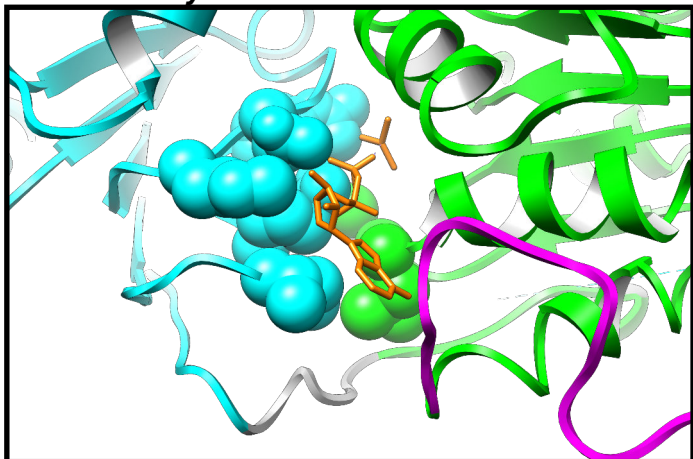

RecA Lobe 2    ADP    RecA Lobe 1    N-Terminus

**B**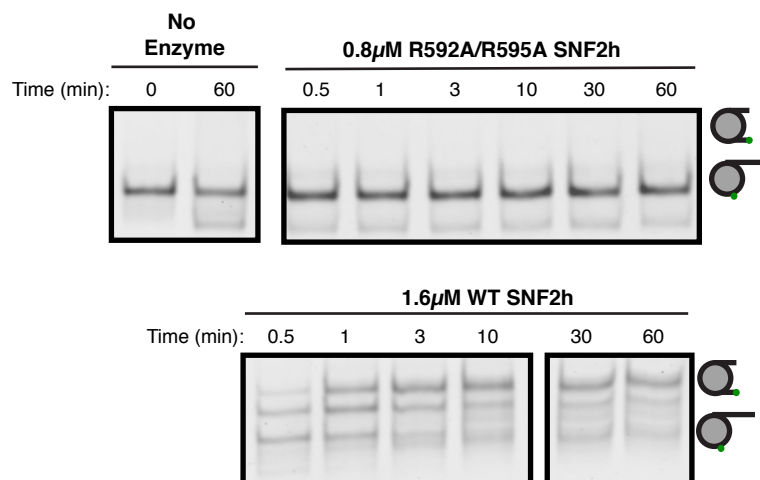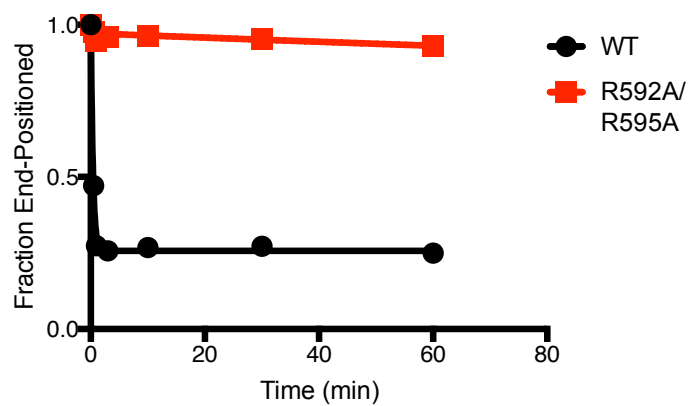

Supplement: supp [file elife-46057-supp-v1.zip › elife_poa_e46057_Figure_3_figure_supplement_2.pdf]
