# Supplementary material for: Cryo-EM structures of remodeler-nucleosome intermediates suggest allosteric control through the nucleosome
Source: eLife journal article supplement (doi:10.7554/elife.46057), 2019-06-18
Supplement: supp [file elife-46057-supp-v1.zip › elife_poa_e46057_Figure_3_figure_supplement_3.pdf]

**A**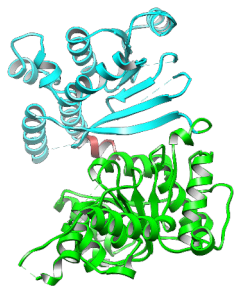

**Apo Swi2/Snf2  
(PDB: 5HZR)**

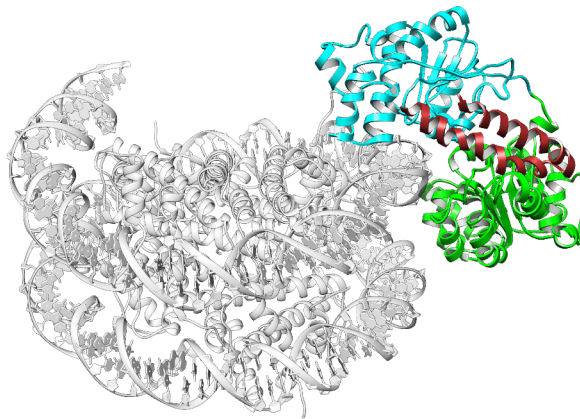

**Nucleosome-bound Swi2/Snf2  
(PDB: 5X0Y)**

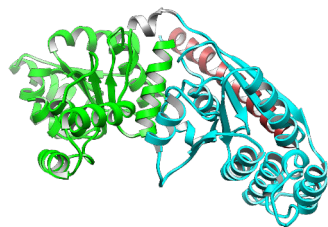

**Apo ISWI  
(PDB: 5JXR)**

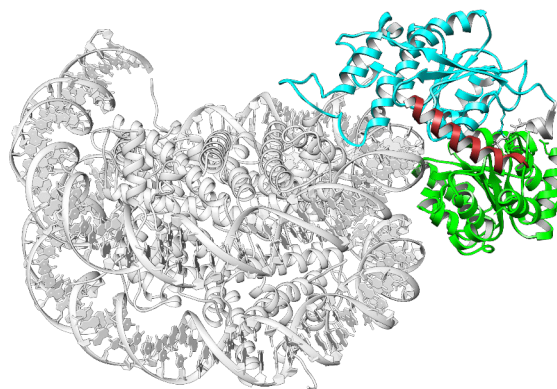

**Nucleosome-bound SNF2h**

**B**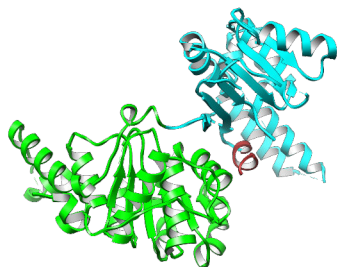

**Apo Swi2/Snf2  
(PDB: 5HZR)**

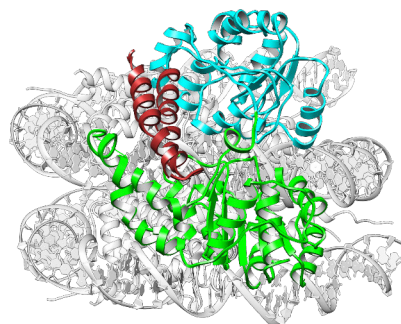

**Nucleosome-bound Swi2/Snf2  
(PDB: 5X0Y)**

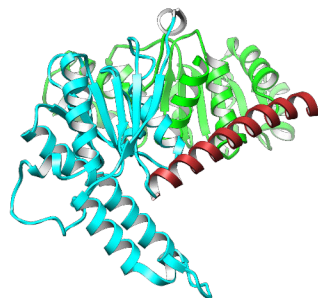

**Apo ISWI  
(PDB: 5JXR)**

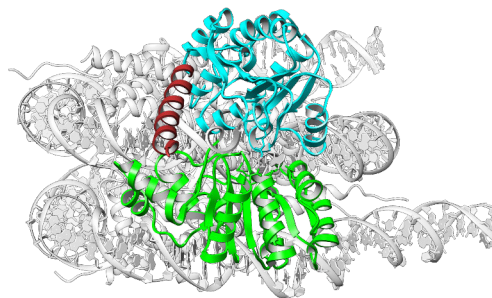

**Nucleosome-bound SNF2h**
