# Supplementary material for: Cryo-EM structures of remodeler-nucleosome intermediates suggest allosteric control through the nucleosome
Source: eLife journal article supplement (doi:10.7554/elife.46057), 2019-06-18
Supplement: supp [file elife-46057-supp-v1.zip › elife_poa_e46057_Figure_3_figure_supplement_5_source_data_1.xlsx]

## Sheet: Sheet 1
	Panel A											Panel C
		Time(min)	No Enzyme	WT SNF2h 800nM	K443A SNF2h 800nM	D442A SNF2h 800nM	WT SNF2h 800nM + 207nM DNA	K443A SNF2h 800nM + 207nM DNA	D442A SNF2h 800nM + 207nM DNA						WT SNF2h			K443A SNF2h			D442A SNF2h			N448A SNF2h			W581A SNF2h			K298E SNF2h
		0	0.7003	0.6918	0.6872	0.6942	0.6859	0.6829	0.6818				k_obs	Alone	0.0930968	0.0676232		0.164072	0.17757		0.0807093	0.0521457		0.154896	0.136446		0.346048	0.293797		0.0847839	0.0854104
		0.333333	0.708	0.6977	0.6907	0.6956	0.6845	0.676	0.6832					+DNA	1.65541	1.59203	1.59444	5.36421	4.61195	3.80015	0.977441	0.836089	0.611279	2.44531	4.08469	3.76164	2.5745	3.65841	3.71255	1.80334	1.8517	1.94032
		0.666667	0.7085	0.6984	0.689	0.6968	0.6789	0.6661	0.6802
		1	0.7083	0.6981	0.6908	0.694	0.68	0.666	0.6827
		1.33333	0.7084	0.6966	0.6904	0.6986	0.6803	0.6501	0.6818
		1.66667	0.7088	0.6972	0.6903	0.6965	0.673	0.6496	0.6825
		2	0.7085	0.6961	0.6916	0.6979	0.6726	0.6418	0.6774			Panel D
		2.33333	0.7089	0.6982	0.6915	0.6962	0.6708	0.6355	0.6763				Time (min)	SNF2h 25nM	SNF2h 25nM+200nM Nucs	K443A SNF2h 10nM	K443A SNF2h 10nM+200nM Nucs	D442A SNF2h 10nM	D442A SNF2h 10nM+600nM Nucs
		2.66667	0.7084	0.6979	0.6913	0.6989	0.6716	0.6329	0.6819				0.5	0.034079	0.0557555	0.0322001	0.0409795	0.0321709	0.0463983	µM ATP hydrolyzed
		3	0.7087	0.6988	0.6902	0.6944	0.6673	0.6303	0.6864				1	0.0406965	0.125749	0.0320055	0.0652121	0.027562	0.0915151
		3.33333	0.7079	0.6972	0.6904	0.6978	0.6651	0.6176	0.6764				1.5	0.0380513	0.172481	0.0330722	0.0897633	0.0306317	0.0993332
		3.66667	0.7087	0.6997	0.6912	0.6947	0.6674	0.6147	0.6812				2	0.0446038	0.223109	0.0471224	0.0992845	0.0490292	0.132646
		4	0.7085	0.6987	0.6909	0.695	0.6668	0.6078	0.6771				2.5	0.0372782	0.283951	0.0416596	0.122787	0.0238935	0.153541
		4.33333	0.7088	0.6983	0.6904	0.6978	0.6604	0.5989	0.6716				3	0.0329075	0.301772	0.03445	0.122766	0.0380119	0.140444
		4.66667	0.7087	0.6985	0.6903	0.6956	0.6597	0.5975	0.6716
		5	0.7078	0.6979	0.6891	0.6975	0.6564	0.597	0.6759
		5.33333	0.7085	0.6979	0.6878	0.6963	0.656	0.5875	0.6729
		5.66667	0.7078	0.6985	0.6906	0.6945	0.6497	0.583	0.6689			Panel E
		6	0.7074	0.6953	0.6896	0.6946	0.6534	0.5764	0.6637				Construct	WT SNF2h	D442A SNF2h	K443A SNF2h
		6.33333	0.7079	0.698	0.6883	0.6963	0.646	0.5685	0.6748				k_obs	3.41	4.9	3.4
		6.66667	0.7075	0.6984	0.6887	0.6956	0.6456	0.5647	0.669					4	3.9	3.3
		7	0.7082	0.6975	0.6879	0.6966	0.6445	0.5632	0.6721					4.72	1.5	3.9
		7.33333	0.7079	0.6971	0.6901	0.694	0.6392	0.5514	0.6684
		7.66667	0.7058	0.6965	0.6881	0.6941	0.6389	0.5529	0.6704
		8	0.7077	0.6959	0.6875	0.6937	0.6384	0.5445	0.6618
		8.33333	0.7061	0.6959	0.689	0.6934	0.6388	0.5412	0.6674
		8.66667	0.7063	0.6963	0.6869	0.6977	0.6323	0.5406	0.6683
		9	0.7063	0.6944	0.69	0.695	0.6308	0.53	0.6652
		9.33333	0.7068	0.6954	0.6877	0.695	0.6307	0.5214	0.6571
		9.66667	0.7065	0.6969	0.6873	0.6949	0.6282	0.5241	0.6669
		10	0.7066	0.6948	0.6872	0.693	0.6227	0.5199	0.665
		10.3333	0.7068	0.6959	0.6867	0.692	0.6253	0.5152	0.6569
		10.6667	0.7061	0.6961	0.6851	0.694	0.6218	0.5153	0.6699
		11	0.7065	0.6954	0.6881	0.6955	0.6234	0.5022	0.6599
		11.3333	0.7064	0.6981	0.6864	0.697	0.6169	0.4989	0.6586
		11.6667	0.7056	0.6966	0.6868	0.6924	0.6201	0.4917	0.6638
		12	0.7066	0.6965	0.6848	0.693	0.6164	0.4894	0.6575
		12.3333	0.7065	0.6951	0.6861	0.6917	0.6101	0.482	0.6556
		12.6667	0.7066	0.6955	0.6851	0.6953	0.6045	0.4818	0.659
		13	0.706	0.6965	0.685	0.693	0.6024	0.4769	0.6564
		13.3333	0.7072	0.6931	0.6844	0.693	0.6048	0.4677	0.6533
		13.6667	0.7061	0.6956	0.6833	0.692	0.6074	0.4644	0.6538
		14	0.7058	0.6929	0.6845	0.6918	0.6052	0.4613	0.6528
		14.3333	0.7074	0.6955	0.6831	0.6926	0.5979	0.4589	0.6596
		14.6667	0.7057	0.6937	0.6846	0.6924	0.595	0.4489	0.661
		15	0.7057	0.6926	0.6846	0.695	0.5916	0.4459	0.6529
		15.3333	0.705	0.6935	0.6863	0.6932	0.5959	0.4349	0.6519
		15.6667	0.7067	0.6933	0.6822	0.693	0.5863	0.4319	0.6471
		16	0.7055	0.6924	0.6817	0.6961	0.5891	0.4336	0.6504
		16.3333	0.7056	0.695	0.6827	0.6933	0.5856	0.4197	0.6495
		16.6667	0.7055	0.691	0.6832	0.6892	0.5847	0.4187	0.6502
		17	0.7065	0.6943	0.683	0.6919	0.5832	0.414	0.6447
		17.3333	0.7043	0.6945	0.682	0.6903	0.583	0.4091	0.6414
		17.6667	0.7056	0.6932	0.6809	0.6938	0.576	0.4052	0.6493
		18	0.7047	0.6915	0.6788	0.693	0.5727	0.3984	0.6423
		18.3333	0.7055	0.6914	0.6823	0.6948	0.5695	0.3984	0.643
		18.6667	0.7049	0.6927	0.682	0.6898	0.5724	0.3875	0.6492
		19	0.7055	0.6922	0.6806	0.6891	0.5707	0.3852	0.6401
		19.3333	0.7061	0.6904	0.6829	0.6904	0.5707	0.378	0.6377
		19.6667	0.7049	0.6917	0.68	0.6888	0.5661	0.3718	0.6388
		20	0.7058	0.692	0.6797	0.6928	0.5631	0.3684	0.6412
		20.3333	0.7048	0.6929	0.6791	0.6913	0.5589	0.3667	0.6487
		20.6667	0.7054	0.6926	0.68	0.691	0.5618	0.3572	0.6285
		21	0.7058	0.6921	0.6797	0.6898	0.5574	0.351	0.6324
		21.3333	0.7045	0.6906	0.6787	0.6936	0.5526	0.345	0.6357
		21.6667	0.7045	0.6899	0.6793	0.688	0.5514	0.3435	0.6333
		22	0.7065	0.6926	0.6774	0.6912	0.5484	0.3395	0.633
		22.3333	0.7056	0.6901	0.6788	0.6902	0.5456	0.3331	0.6303
		22.6667	0.7045	0.6894	0.6795	0.6881	0.5498	0.3231	0.6315
		23	0.7053	0.6908	0.6782	0.6909	0.5425	0.3195	0.6283
		23.3333	0.705	0.6891	0.6772	0.6896	0.5403	0.3155	0.6296
		23.6667	0.7043	0.6886	0.6773	0.6869	0.5352	0.3079	0.6216
		24	0.7048	0.6891	0.6751	0.6887	0.5344	0.3015	0.6276
		24.3333	0.7048	0.6905	0.6777	0.6888	0.5364	0.2977	0.6237
		24.6667	0.7051	0.6907	0.6744	0.686	0.5367	0.2841	0.6196
		25	0.7045	0.6907	0.676	0.6884	0.5284	0.2886	0.6265
		25.3333	0.7064	0.69	0.675	0.689	0.5297	0.2783	0.6248
		25.6667	0.7046	0.6889	0.6768	0.6887	0.5256	0.2779	0.6307
		26	0.7049	0.6889	0.6751	0.6898	0.5238	0.2712	0.6221
		26.3333	0.704	0.6884	0.6753	0.6893	0.5218	0.264	0.6266
		26.6667	0.7028	0.6888	0.6737	0.6912	0.5162	0.2608	0.6173
		27	0.7041	0.6892	0.6743	0.6868	0.5146	0.2545	0.6203
		27.3333	0.704	0.6868	0.6753	0.6884	0.5118	0.2494	0.6269
		27.6667	0.7052	0.6895	0.6752	0.6842	0.5129	0.2459	0.6199
		28	0.7041	0.6906	0.672	0.688	0.5077	0.2357	0.6219
		28.3333	0.7039	0.6869	0.6735	0.6895	0.5041	0.2304	0.6189
		28.6667	0.7033	0.6887	0.6738	0.6859	0.502	0.2241	0.6133
		29	0.7035	0.6864	0.6729	0.6885	0.4999	0.2259	0.6136
		29.3333	0.7034	0.6869	0.6716	0.6892	0.5018	0.2177	0.6111
		29.6667	0.704	0.6878	0.6703	0.6899	0.4949	0.2152	0.6146
		30	0.7023	0.6871	0.6722	0.6854	0.4975	0.203	0.5987
	Panel B
		Time(min)	No Enzyme	WT SNF2h	N448A SNF2h alone	W581A SNF2h alone	WT SNF2h +207nM DNA	N448A SNF2h +207 nM DNA	W581A SNF2h +207nM DNA
		0	0.6594	0.6782	0.6692	0.6771	0.6695	0.6757	0.7193
		0.333333	0.6659	0.6804	0.6707	0.6805	0.667	0.6734	0.7174
		0.666667	0.6666	0.6812	0.6714	0.6791	0.6614	0.6705	0.7137
		1	0.6662	0.6834	0.6705	0.6804	0.6616	0.6627	0.7095
		1.33333	0.666	0.6824	0.6713	0.6795	0.6611	0.6662	0.7054
		1.66667	0.6662	0.6802	0.6713	0.6799	0.6609	0.6538	0.6999
		2	0.6668	0.6798	0.6697	0.6799	0.6579	0.6468	0.6973
		2.33333	0.6668	0.6822	0.671	0.6786	0.6521	0.6448	0.6948
		2.66667	0.6657	0.6799	0.6697	0.6796	0.6558	0.6404	0.6903
		3	0.666	0.6808	0.6699	0.6788	0.6515	0.6387	0.6911
		3.33333	0.6656	0.6816	0.6692	0.6806	0.6474	0.6322	0.6853
		3.66667	0.6653	0.6792	0.6718	0.6801	0.6536	0.6361	0.6833
		4	0.6658	0.6789	0.6711	0.6771	0.6476	0.6232	0.6771
		4.33333	0.6664	0.6796	0.6689	0.6776	0.646	0.6219	0.6698
		4.66667	0.6656	0.6844	0.671	0.6782	0.6386	0.6145	0.6721
		5	0.6666	0.6805	0.6722	0.6779	0.6399	0.6124	0.6623
		5.33333	0.6655	0.6811	0.6717	0.6782	0.634	0.6114	0.6646
		5.66667	0.6662	0.677	0.6703	0.6787	0.639	0.6032	0.6573
		6	0.6666	0.6814	0.6689	0.6778	0.6394	0.5992	0.6525
		6.33333	0.6654	0.6773	0.6708	0.6743	0.6338	0.5966	0.6489
		6.66667	0.6669	0.679	0.6694	0.6768	0.6297	0.5869	0.6436
		7	0.6656	0.6788	0.6717	0.6783	0.6314	0.5858	0.6446
		7.33333	0.6654	0.6775	0.6705	0.6782	0.628	0.5839	0.64
		7.66667	0.6659	0.6795	0.6707	0.6757	0.6266	0.5859	0.6361
		8	0.6651	0.6761	0.6685	0.673	0.6256	0.5735	0.6301
		8.33333	0.6655	0.6781	0.6693	0.6735	0.6201	0.5694	0.628
		8.66667	0.6653	0.6803	0.668	0.6772	0.6254	0.562	0.624
		9	0.6652	0.6768	0.6692	0.6754	0.6196	0.5609	0.6181
		9.33333	0.6657	0.6793	0.6698	0.6742	0.6181	0.5567	0.6142
		9.66667	0.6649	0.679	0.6683	0.6736	0.623	0.5575	0.6125
		10	0.6656	0.6799	0.6694	0.6721	0.6133	0.5519	0.6082
		10.3333	0.6652	0.677	0.667	0.674	0.6102	0.5429	0.6072
		10.6667	0.666	0.678	0.6688	0.6717	0.6125	0.542	0.5991
		11	0.6648	0.6761	0.6685	0.6707	0.6102	0.5399	0.5961
		11.3333	0.665	0.6759	0.6671	0.6732	0.6127	0.5331	0.5955
		11.6667	0.6647	0.6752	0.6663	0.6725	0.6055	0.5279	0.5882
		12	0.6654	0.6764	0.6657	0.6709	0.6089	0.53	0.5932
		12.3333	0.665	0.6795	0.6682	0.6716	0.5961	0.5228	0.5841
		12.6667	0.6652	0.6741	0.6684	0.6696	0.5977	0.5181	0.5819
		13	0.6653	0.6785	0.6663	0.6704	0.5962	0.5131	0.5753
		13.3333	0.6643	0.675	0.6659	0.672	0.5971	0.5113	0.5766
		13.6667	0.6647	0.6806	0.666	0.6717	0.5969	0.5007	0.5677
		14	0.6647	0.6765	0.6681	0.6698	0.5897	0.4989	0.5661
		14.3333	0.6654	0.6789	0.6664	0.6718	0.5894	0.4975	0.5649
		14.6667	0.6646	0.6777	0.6653	0.671	0.5925	0.499	0.5528
		15	0.6649	0.6754	0.6669	0.6677	0.5902	0.4948	0.5595
		15.3333	0.6651	0.6724	0.6675	0.6677	0.5885	0.485	0.5548
		15.6667	0.6644	0.6759	0.6644	0.6723	0.5865	0.4814	0.5559
		16	0.6644	0.6716	0.665	0.6684	0.582	0.4752	0.5495
		16.3333	0.6653	0.6777	0.667	0.6692	0.5811	0.4735	0.5389
		16.6667	0.6653	0.6754	0.6669	0.6681	0.5788	0.4707	0.5436
		17	0.6654	0.6767	0.6638	0.6692	0.5799	0.4607	0.5369
		17.3333	0.6648	0.6782	0.6635	0.6709	0.5695	0.4537	0.5299
		17.6667	0.6644	0.6766	0.6647	0.6641	0.5783	0.4545	0.5255
		18	0.665	0.6757	0.6669	0.668	0.5737	0.4551	0.5281
		18.3333	0.6642	0.6745	0.665	0.6676	0.5786	0.449	0.5255
		18.6667	0.6651	0.6738	0.6644	0.6658	0.5745	0.4477	0.5227
		19	0.6639	0.6754	0.6638	0.6638	0.5698	0.4408	0.5065
		19.3333	0.6648	0.6749	0.6631	0.6688	0.5641	0.4333	0.5059
		19.6667	0.6645	0.6727	0.6649	0.6632	0.5665	0.4336	0.5046
		20	0.6648	0.6746	0.6645	0.6651	0.5628	0.4286	0.4985
		20.3333	0.664	0.6749	0.6641	0.6618	0.5595	0.4278	0.5096
		20.6667	0.6643	0.679	0.6658	0.667	0.5554	0.4149	0.4998
		21	0.6644	0.6777	0.6642	0.6625	0.5573	0.4202	0.4955
		21.3333	0.6645	0.6733	0.6629	0.6645	0.5564	0.4057	0.4875
		21.6667	0.6644	0.6753	0.6626	0.6595	0.5515	0.4075	0.4837
		22	0.6628	0.6734	0.6629	0.6608	0.5504	0.4101	0.4865
		22.3333	0.6642	0.676	0.6597	0.664	0.5519	0.391	0.4834
		22.6667	0.6644	0.6756	0.6607	0.659	0.5536	0.3983	0.4741
		23	0.6644	0.6745	0.6621	0.6636	0.5477	0.3917	0.472
		23.3333	0.6637	0.6748	0.6626	0.659	0.542	0.3845	0.4684
		23.6667	0.6625	0.6764	0.6613	0.6578	0.5392	0.3795	0.466
		24	0.665	0.6716	0.6608	0.6614	0.537	0.3745	0.4674
		24.3333	0.6638	0.6744	0.6613	0.6556	0.5376	0.3727	0.4605
		24.6667	0.6636	0.6728	0.6616	0.6545	0.5415	0.3746	0.4608
		25	0.664	0.6731	0.6606	0.6617	0.535	0.3644	0.4526
		25.3333	0.6644	0.6729	0.6607	0.6583	0.5308	0.3595	0.4477
		25.6667	0.6633	0.6746	0.6619	0.6573	0.534	0.3547	0.4432
		26	0.6641	0.6757	0.6619	0.6559	0.5302	0.3542	0.4379
		26.3333	0.6637	0.6729	0.6623	0.6571	0.5265	0.346	0.4392
		26.6667	0.6634	0.6737	0.6596	0.6547	0.5242	0.3391	0.4303
		27	0.6634	0.6695	0.6601	0.657	0.5249	0.34	0.4372
		27.3333	0.6624	0.6749	0.6608	0.6548	0.52	0.3343	0.4257
		27.6667	0.6637	0.6722	0.6598	0.6578	0.5217	0.3348	0.4264
		28	0.6641	0.6715	0.6625	0.6549	0.5201	0.3259	0.4078
		28.3333	0.6633	0.6706	0.6616	0.6561	0.5182	0.325	0.4134
		28.6667	0.6627	0.6724	0.6592	0.6518	0.5158	0.318	0.4137
		29	0.6633	0.6699	0.6602	0.6534	0.5134	0.3121	0.4052
		29.3333	0.6639	0.6719	0.6595	0.6526	0.5106	0.317	0.4041
		29.6667	0.6632	0.6756	0.6587	0.6512	0.5151	0.3058	0.408
		30	0.6637	0.6698	0.6584	0.6533	0.5075	0.3065	0.3878
