# Supplementary material for: Cryo-EM structures of remodeler-nucleosome intermediates suggest allosteric control through the nucleosome
Source: eLife journal article supplement (doi:10.7554/elife.46057), 2019-06-18
Supplement: supp [file elife-46057-supp-v1.zip › elife_poa_e46057_Figure_3_source_data_1.xlsx]

## Sheet: Sheet1
	Panel E
		Time (min)	WT SNF2h		Time (min)	K440A SNF2h		Time (min)	D442A SNF2h		Time (min)	K443A SNF2h
		0.25	0.801043		0.5	0.766509		0.25	0.469529		1	0.774987	Fraction End-Positioned
		0.5	0.591185		1	0.654894		0.5	0.258008		5	0.397424
		0.75	0.415808		1.5	0.573518		0.75	0.211656		10	0.258596
		1	0.379679		10	0.311284		1	0.187995		20	0.209808
		2	0.264675		30	0.325029		2	0.170217		40	0.217688
		10	0.209772		93	0.296072		10	0.198509		80	0.215513
	Panel F
		Construct	WT	K440A	D442A	K443A
		k_obs	2.414	0.552	3.672	0.2785
			2.611	0.5014	4.322	0.3007
			1.514	0.4981	4.294	0.4938
