# Supplementary material for: Cryo-EM structures of remodeler-nucleosome intermediates suggest allosteric control through the nucleosome
Source: eLife journal article supplement (doi:10.7554/elife.46057), 2019-06-18
Supplement: supp [file elife-46057-supp-v1.zip › elife_poa_e46057_Figure_4_source_data_1.xlsx]

## Sheet: Sheet1
	Panel B, middle
		Time (min)	WT SNF2h		Time (min)	K298E SNF2h		Time (min)	N448A SNF2h		Time (min)	W581A SNF2h
		0.25	0.706917		0.25	0.764959		0.583333	0.911555		0.583333	0.775879	Fraction End-positioned
		0.5	0.455969		0.5	0.668952		1	0.850772		1	0.622827
		0.75	0.33383		1	0.526875		2	0.709195		2	0.408651
		1	0.276098		2	0.357918		5	0.44737		5	0.252556
		2	0.263291		5	0.262186		15	0.309756		15	0.242204
		10	0.220899		30	0.249686		60	0.300432		60	0.255086
	Panel B, Right
		Construct	WT	K298E	N448A	W581A
		k_obs	2.414	0.6986	0.2307	0.6856
			2.611	0.5749	0.3229	0.698
			1.514	0.8613	0.2112	0.5906
