# Supplementary figures and images for: Cryo-EM structures of remodeler-nucleosome intermediates suggest allosteric control through the nucleosome
Source: eLife journal article supplement (doi:10.7554/elife.46057), 2019-06-18

**A**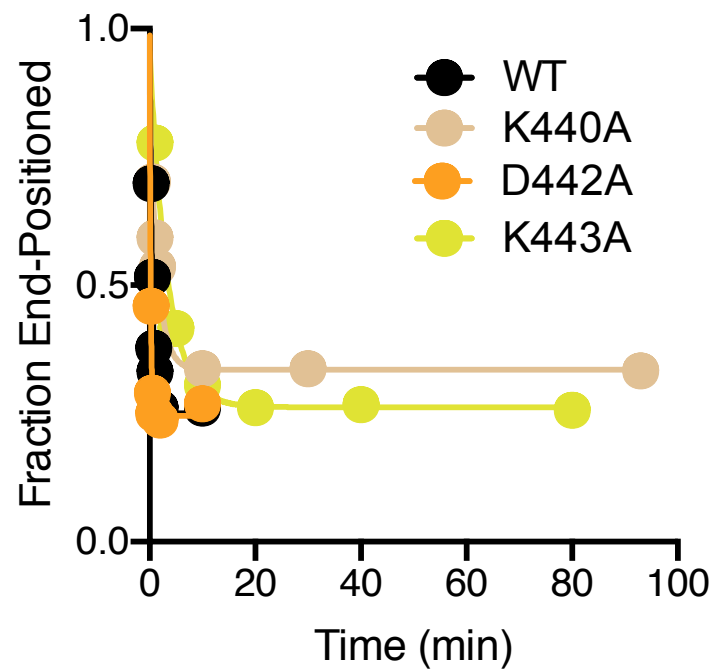**B**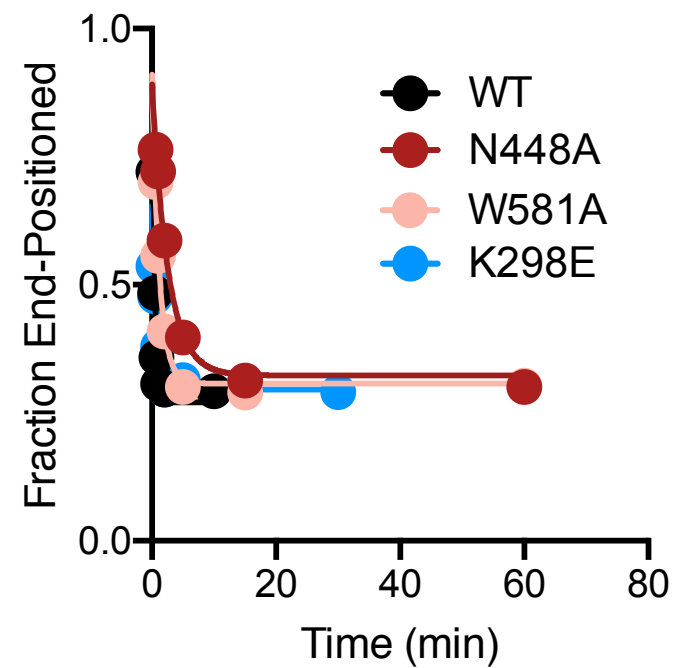

Supplement: supp [file elife-46057-supp-v1.zip › elife_poa_e46057_Figure_3_figure_supplement_6.pdf]

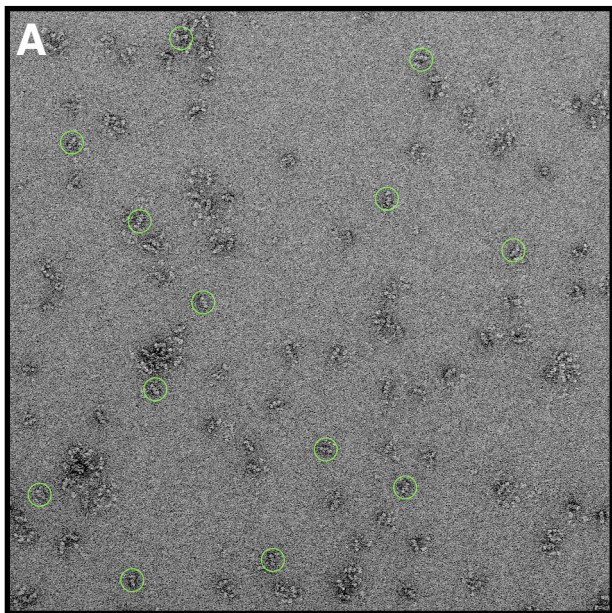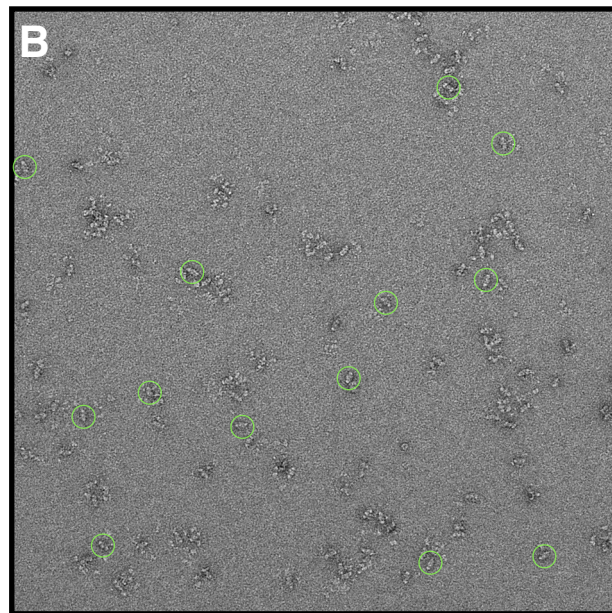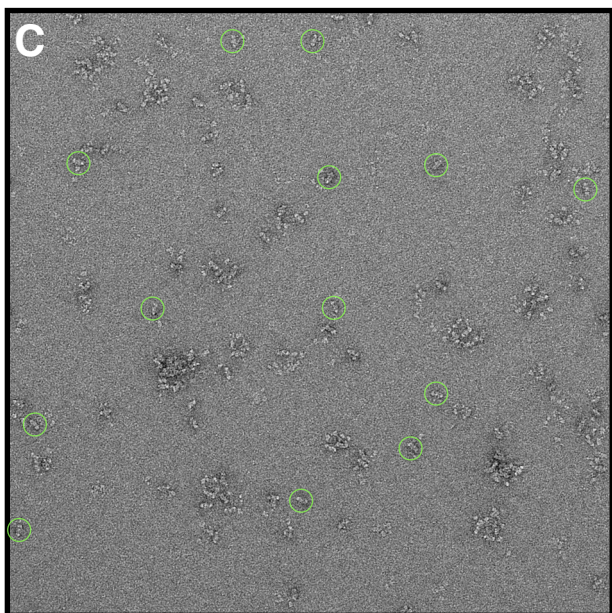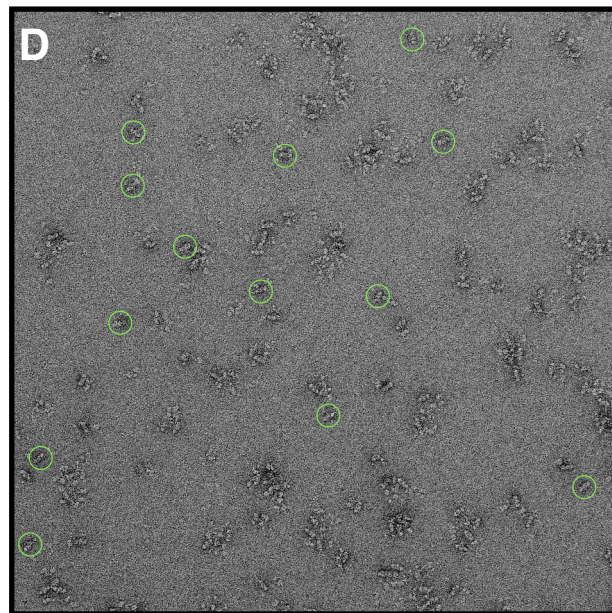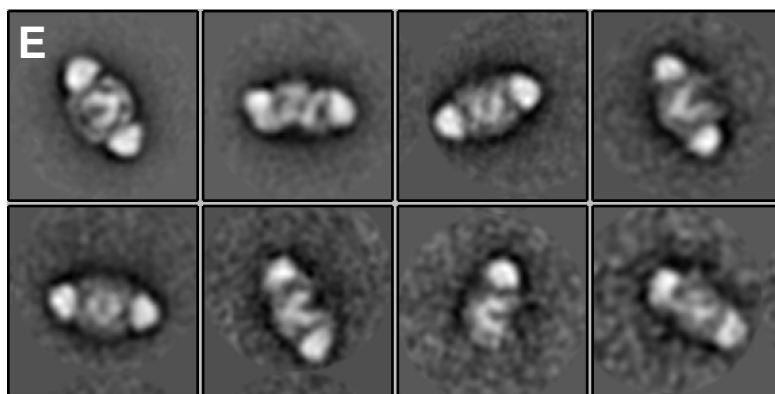

Supplement: supp [file elife-46057-supp-v1.zip › elife_poa_e46057_Figure_2_figure_supplement_3.pdf]

**A**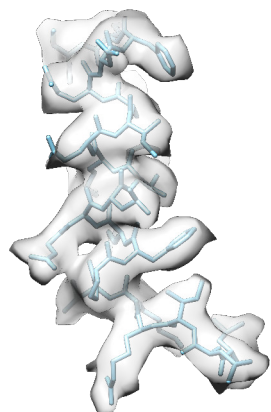

H3: 60-85

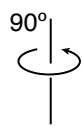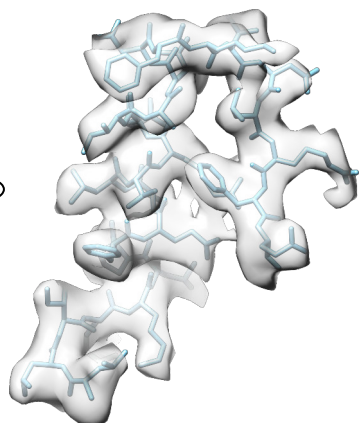

H3:60-85

**B**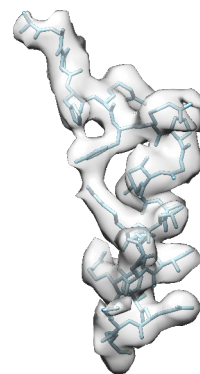

H3:36-57

**C**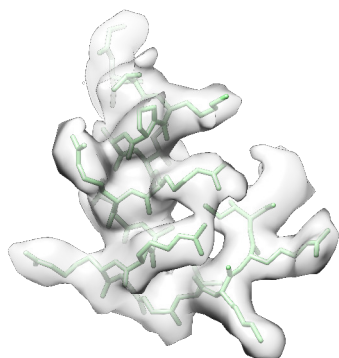

H4:28-46

**D**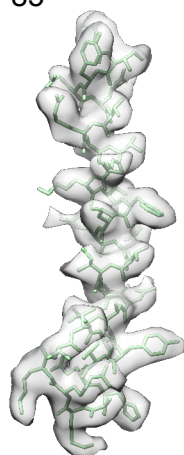

H4:49-81

**E**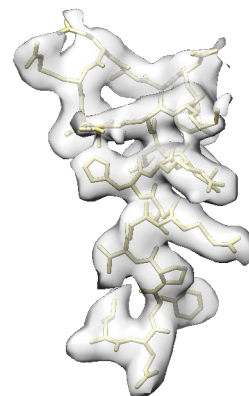

H2a:23-43

**F**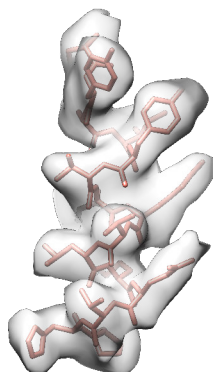

H2b: 33-47

**G**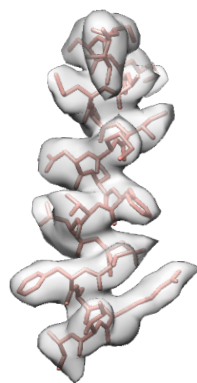

H2b:51-71

**H**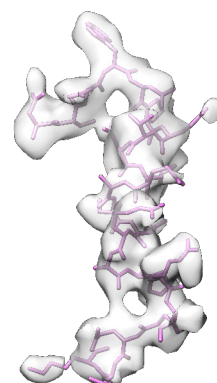

SNF2h: 578-600

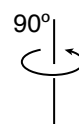**I**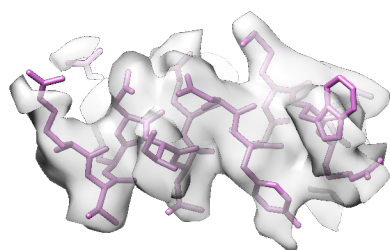

SNF2h:510-521

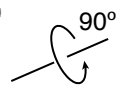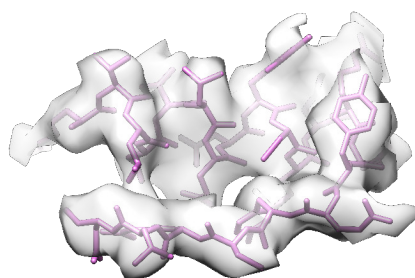

SNF2h:510-530

**J**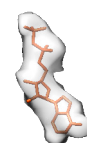

ADP

Supplement: supp [file elife-46057-supp-v1.zip › elife_poa_e46057_Figure_3_figure_supplement_1.pdf]

**A****SHL+2**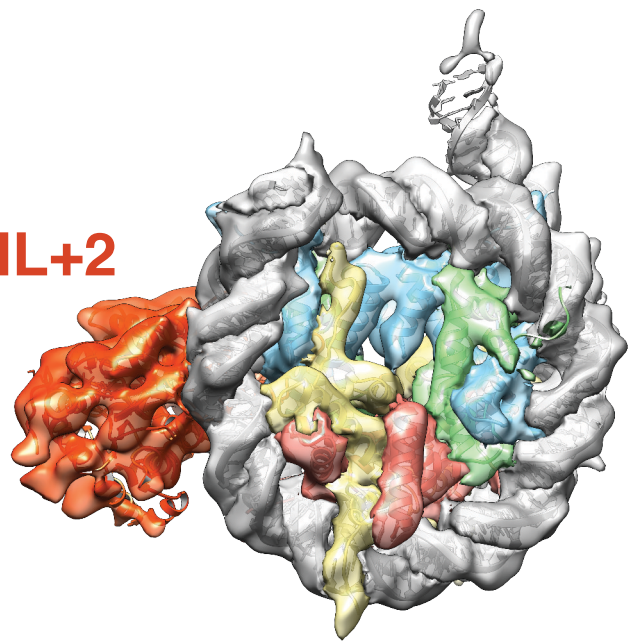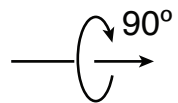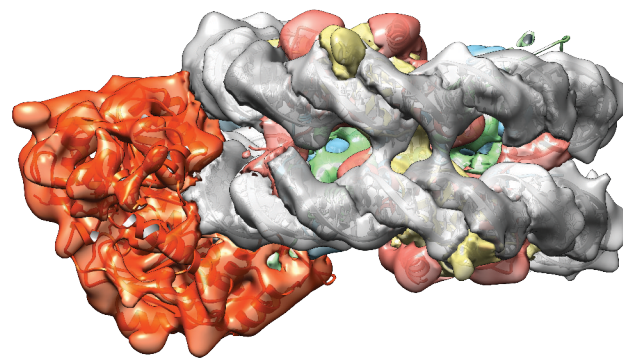**B****SHL-2**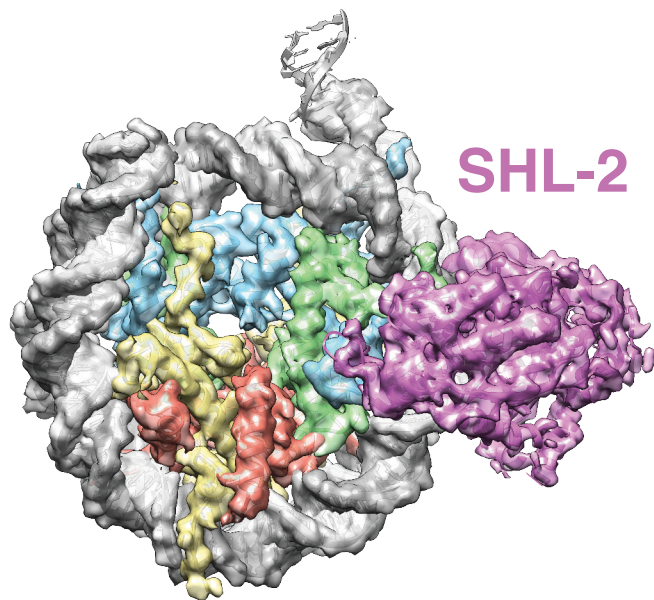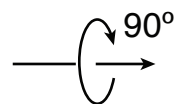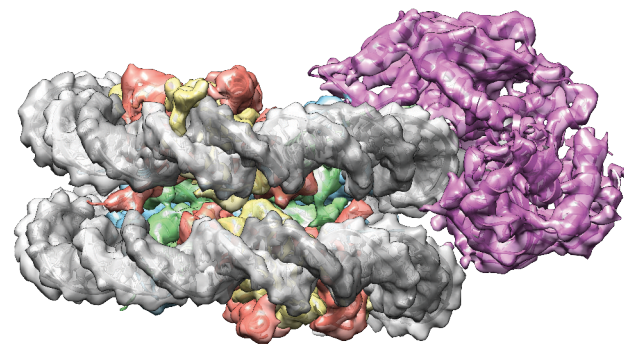

Supplement: supp [file elife-46057-supp-v1.zip › elife_poa_e46057_Figure_1_figure_supplement_2.pdf]

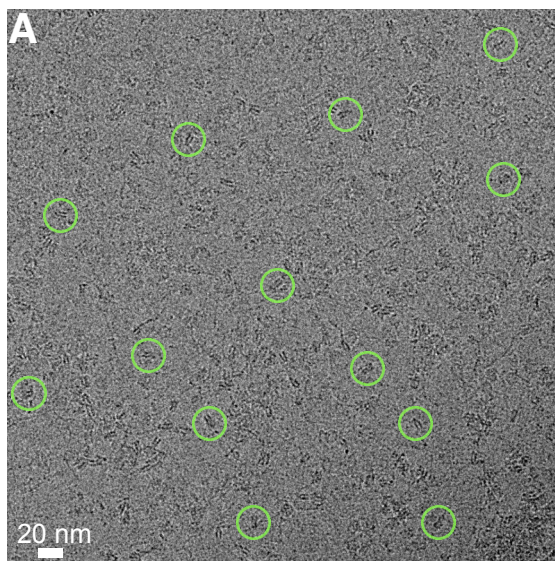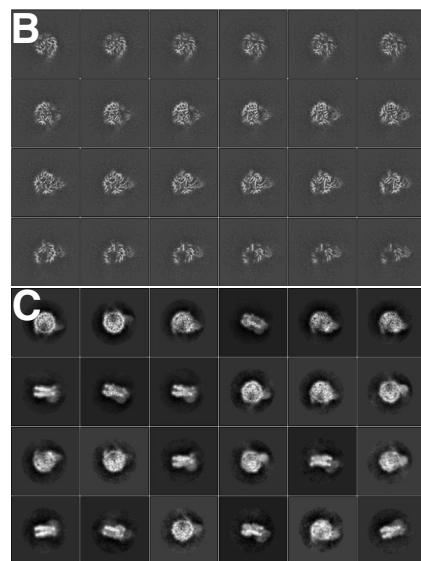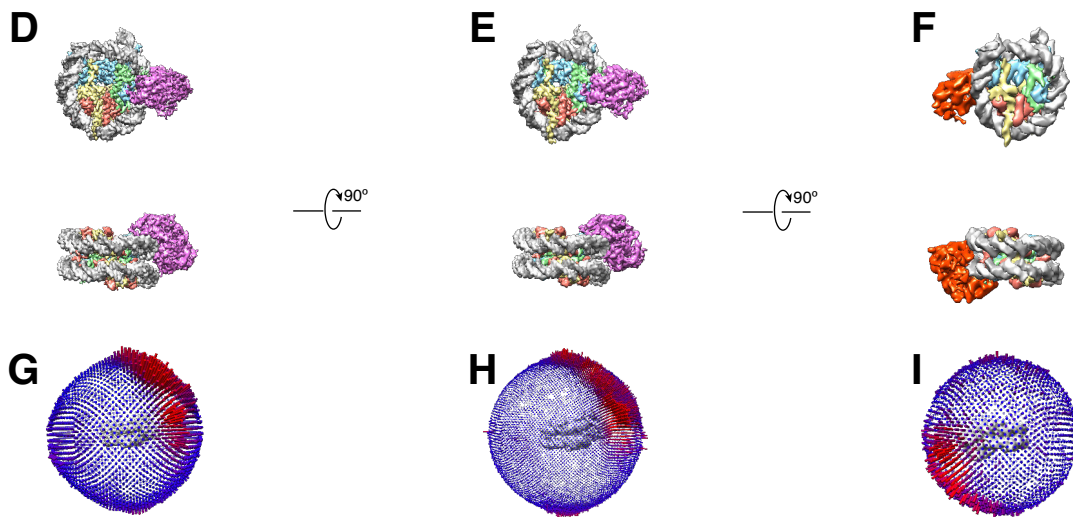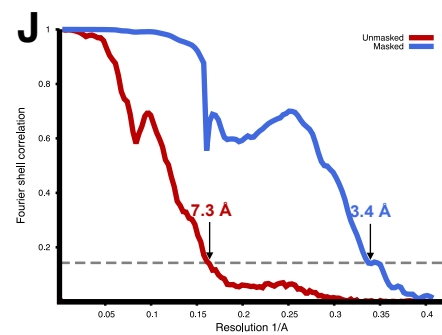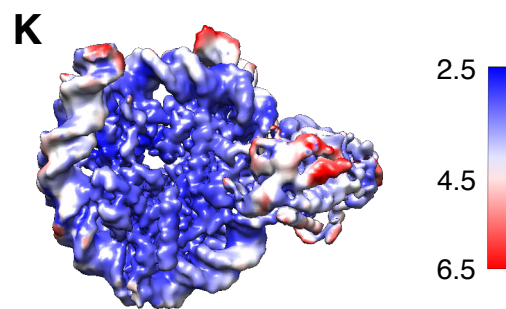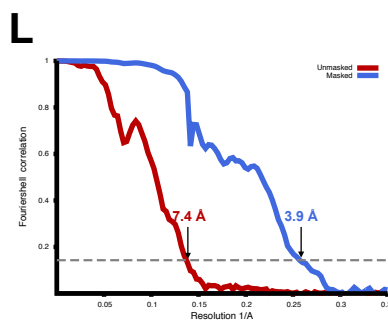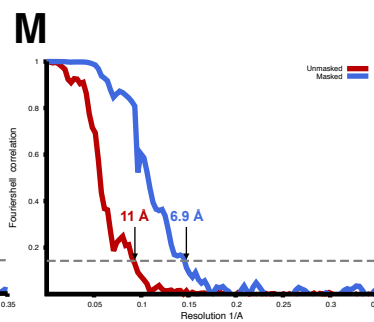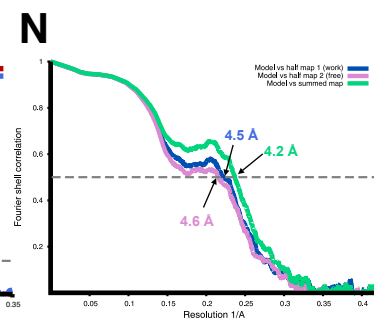

Supplement: supp [file elife-46057-supp-v1.zip › elife_poa_e46057_Figure_1_figure_supplement_1.pdf]

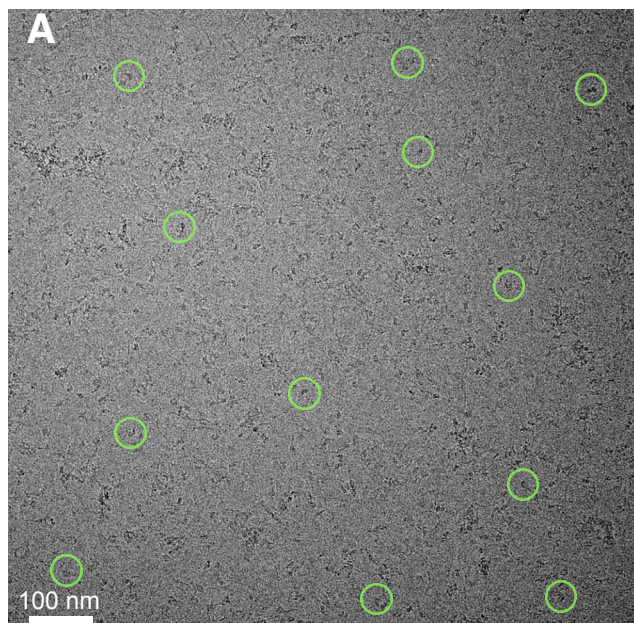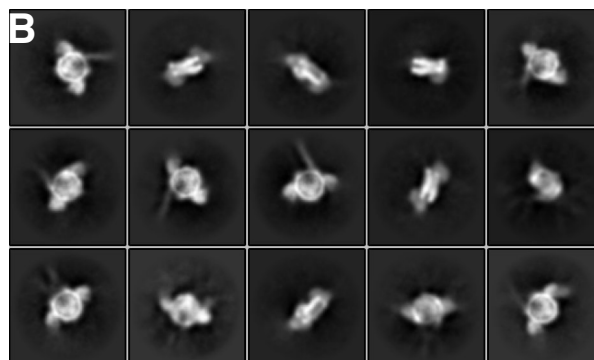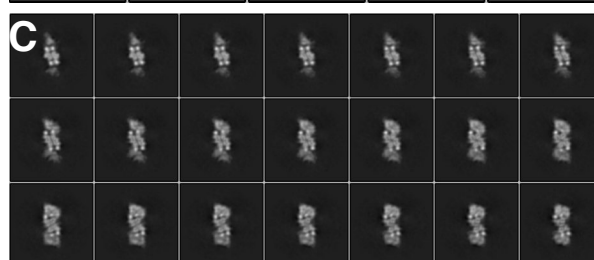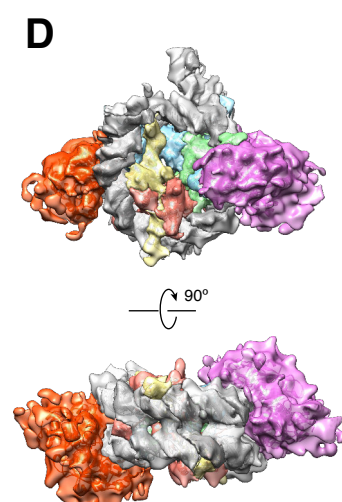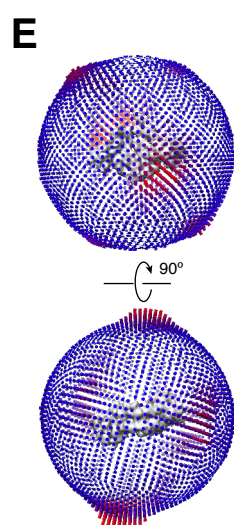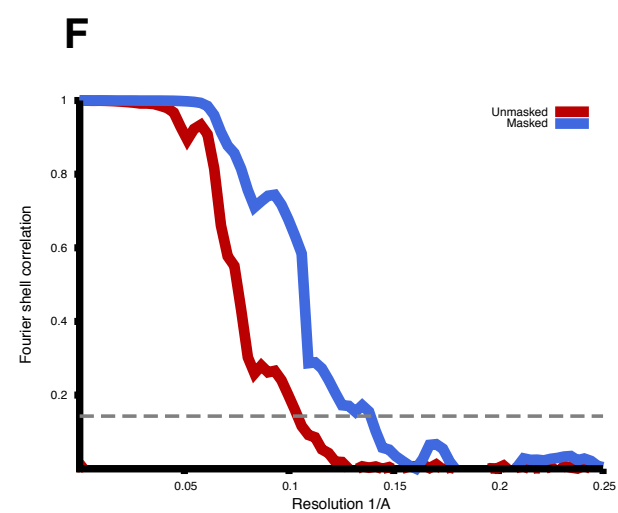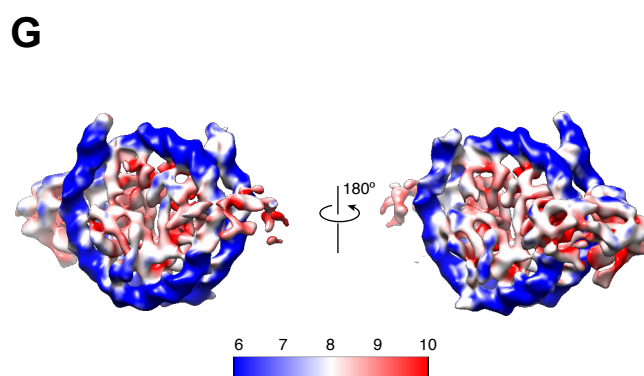

Supplement: supp [file elife-46057-supp-v1.zip › elife_poa_e46057_Figure_2_figure_supplement_1.pdf]

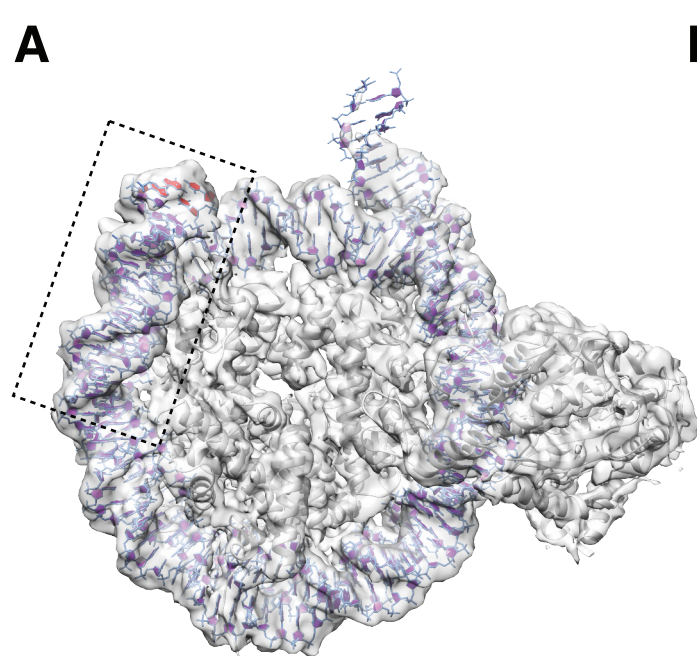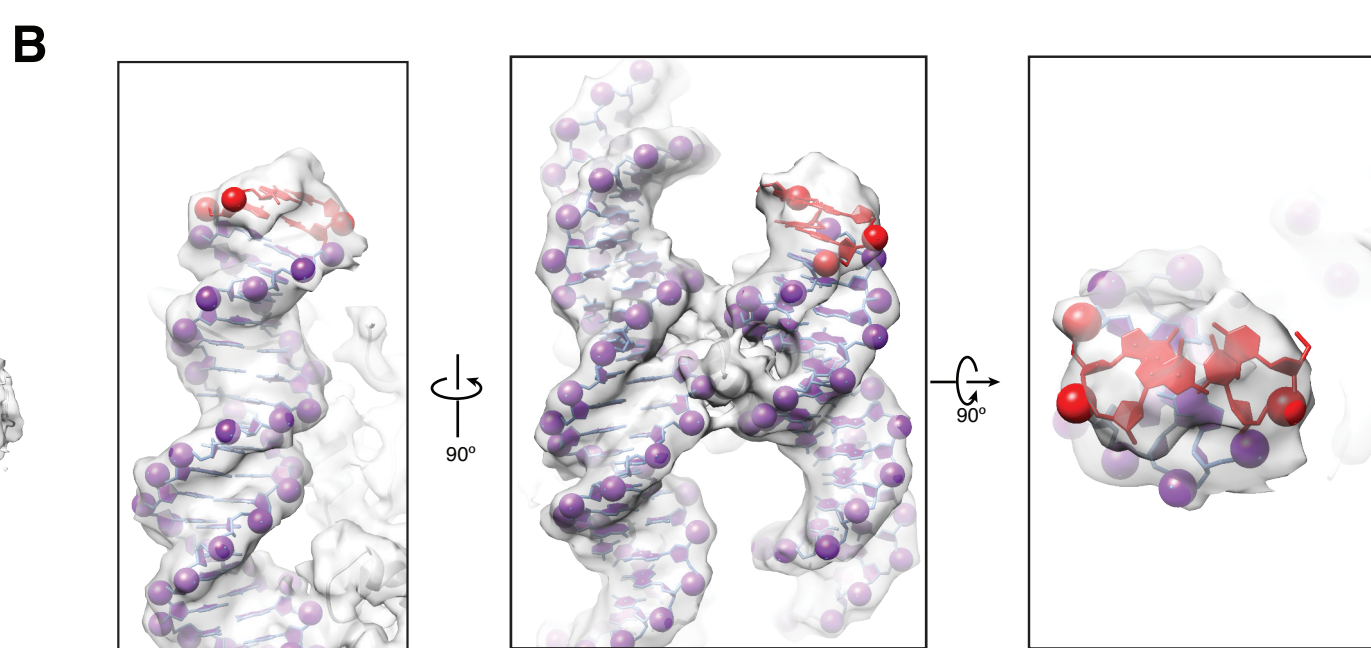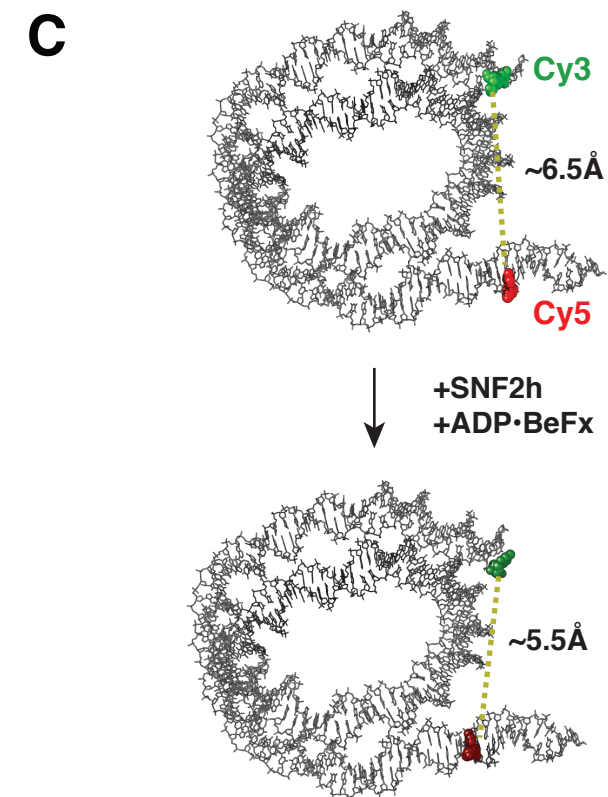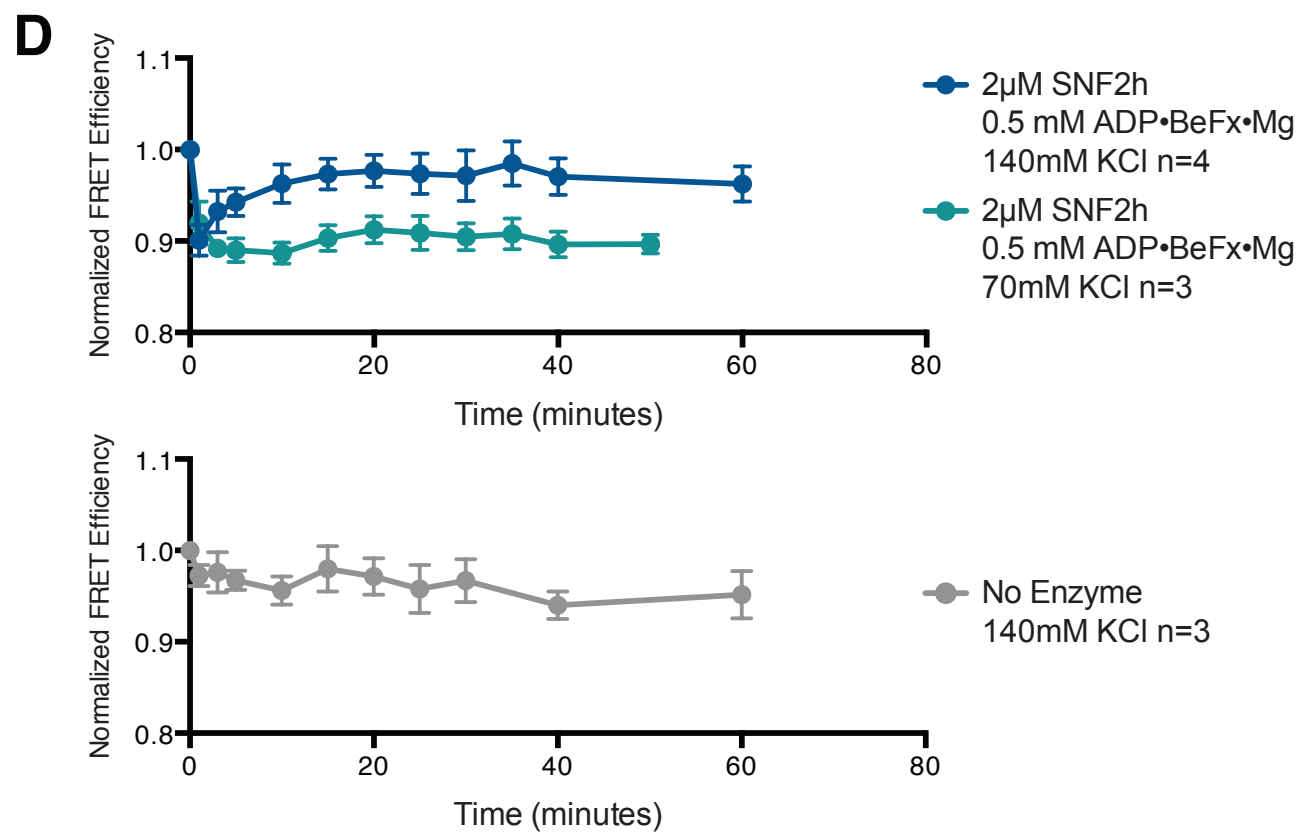

Supplement: supp [file elife-46057-supp-v1.zip › elife_poa_e46057_Figure_1_figure_supplement_3.pdf]

**A**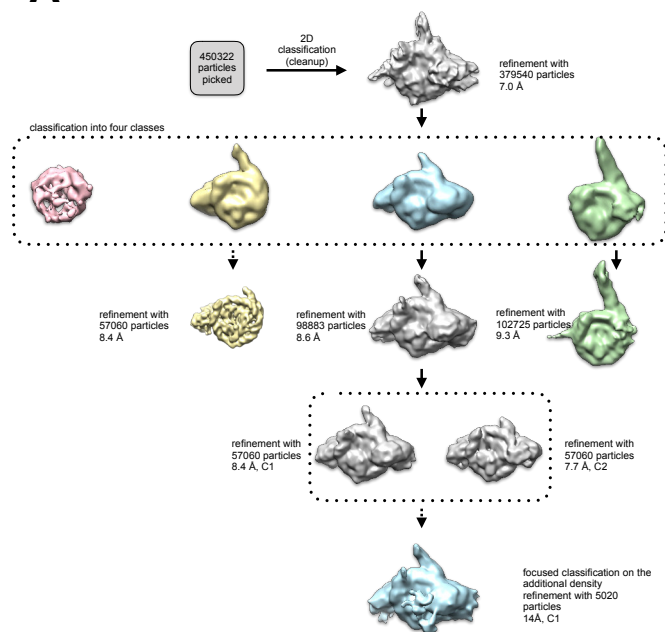**B**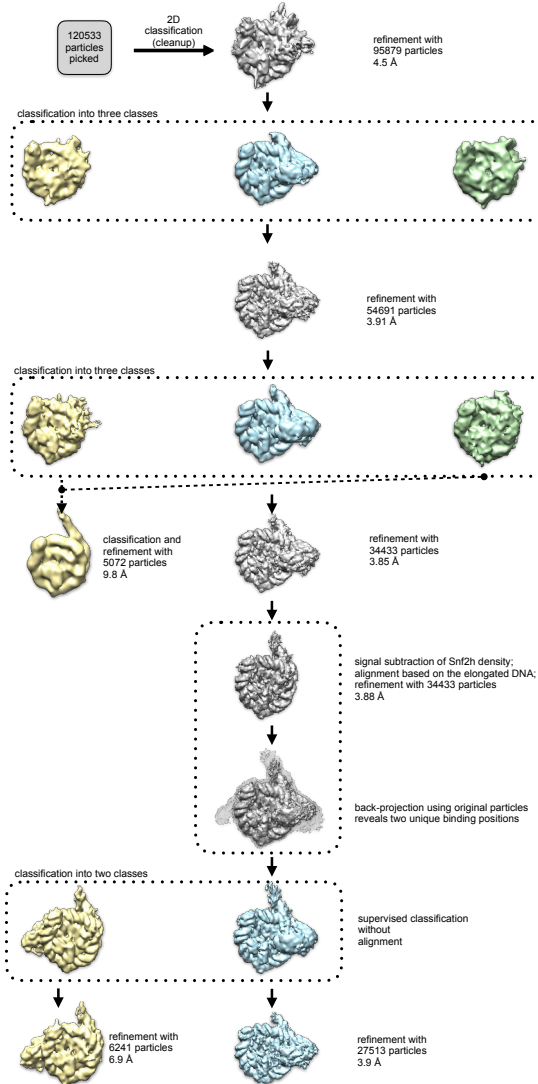**C**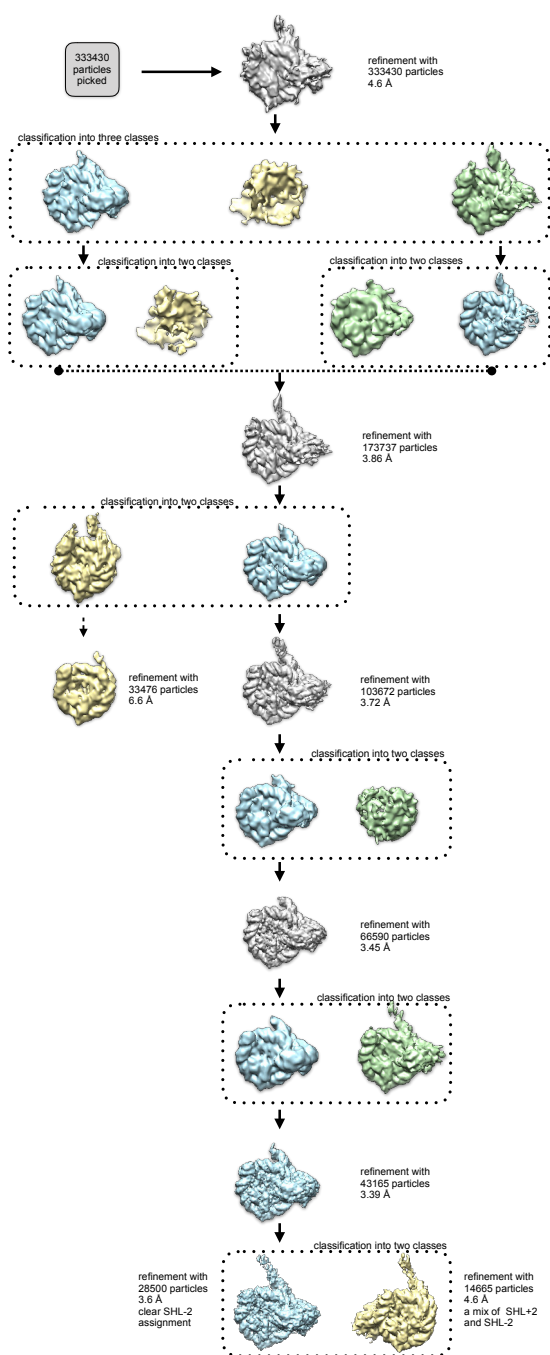**D**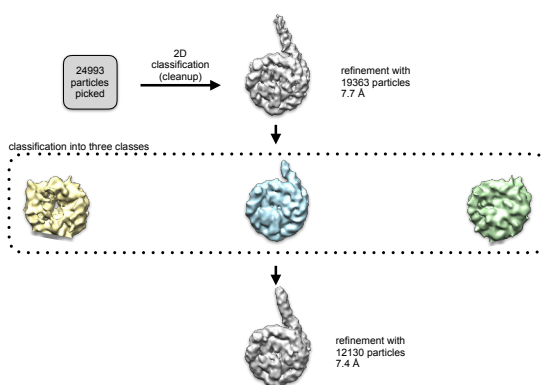

Supplement: supp [file elife-46057-supp-v1.zip › elife_poa_e46057_Figure_2_figure_supplement_2.pdf]

## Comparison with a core nucleosome X-ray structure

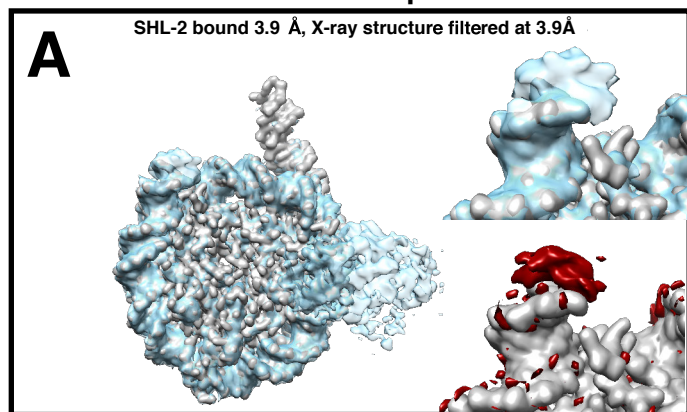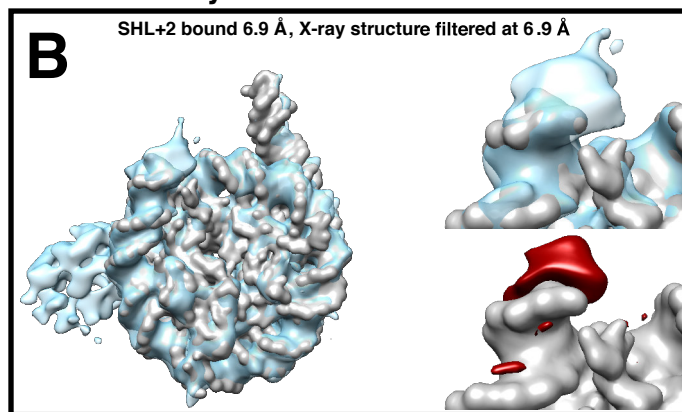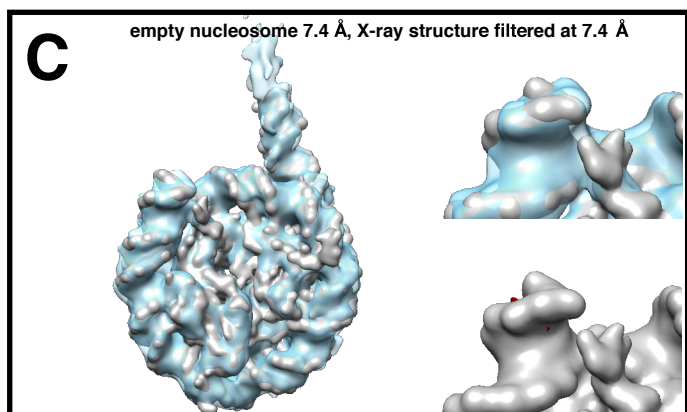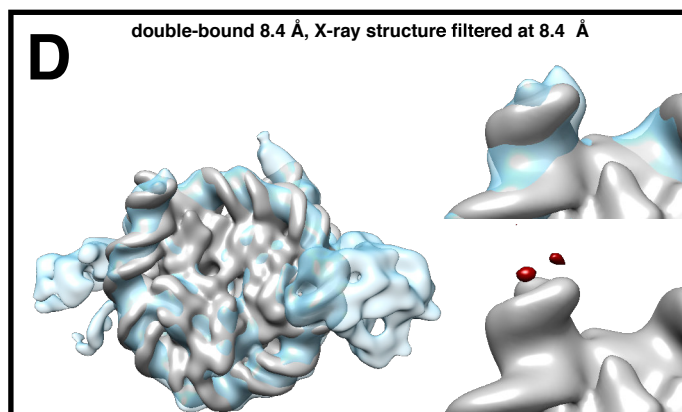

Supplement: supp [file elife-46057-supp-v1.zip › elife_poa_e46057_Figure_1_figure_supplement_5.pdf]

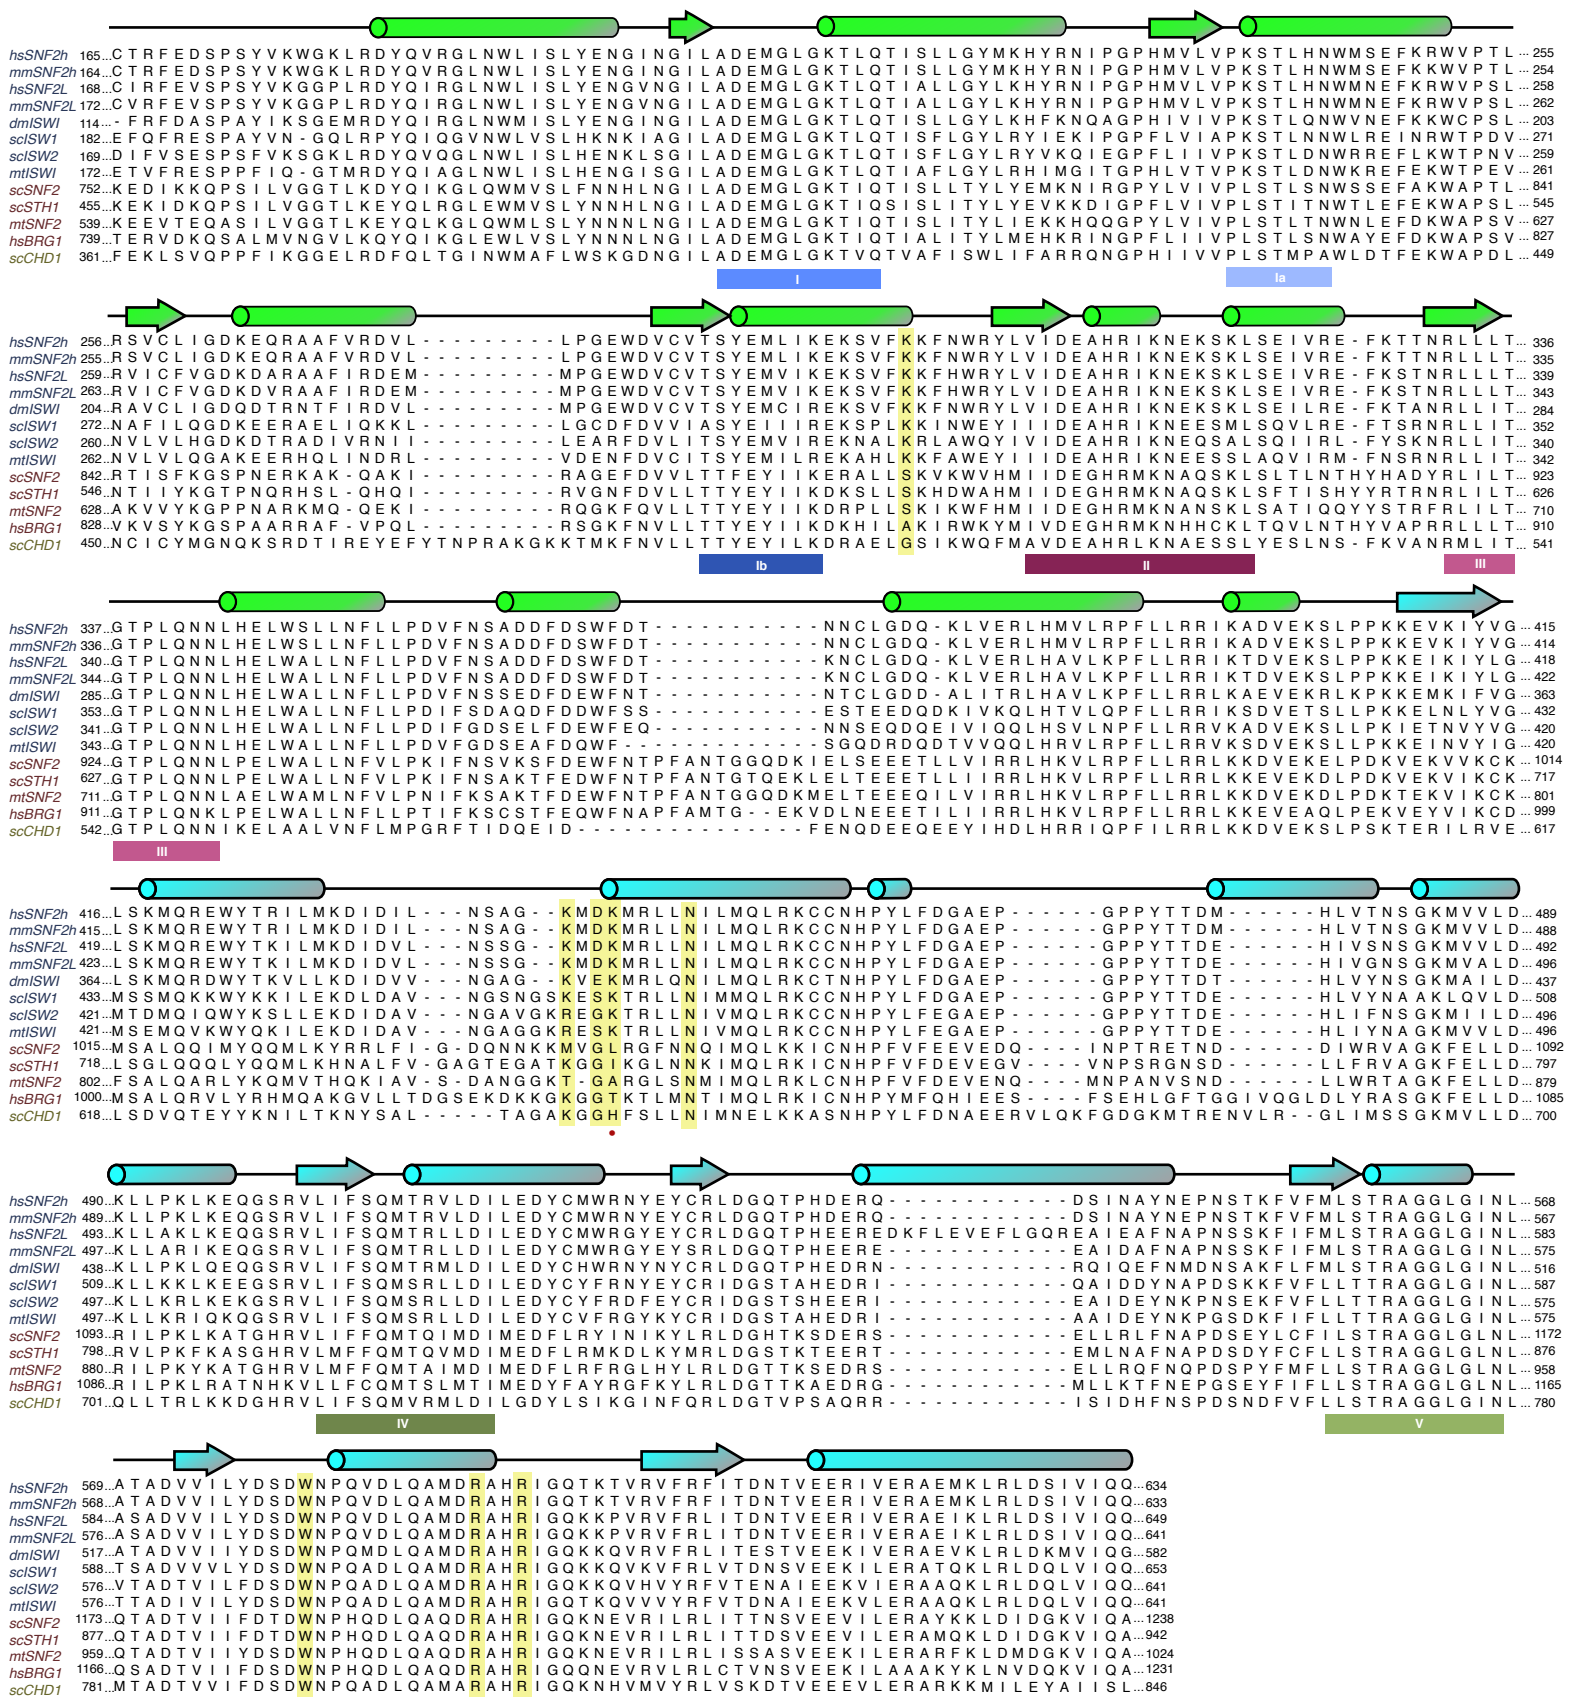

Supplement: supp [file elife-46057-supp-v1.zip › elife_poa_e46057_Figure_3_figure_supplement_4.pdf]

**A**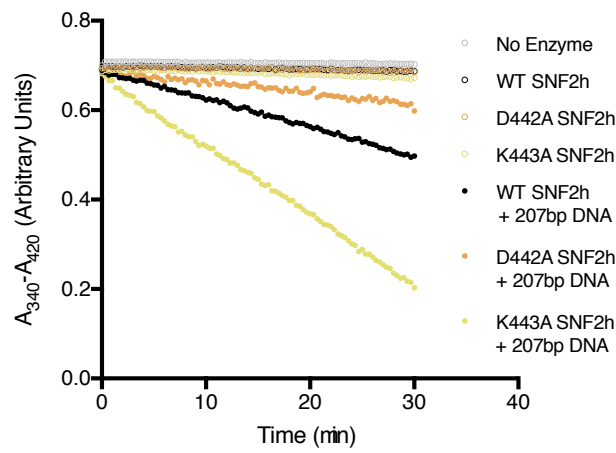**B**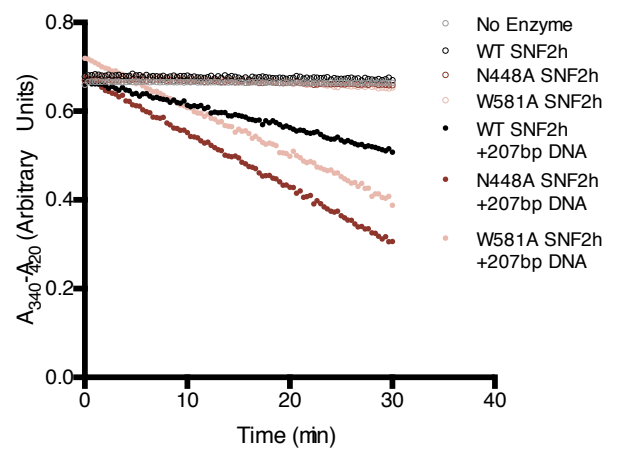**C**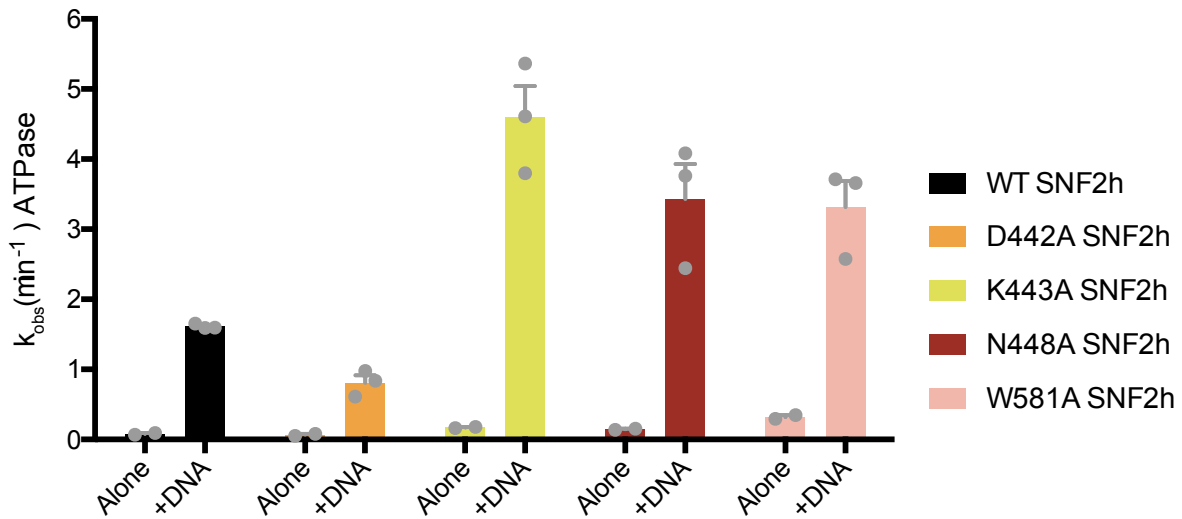**D**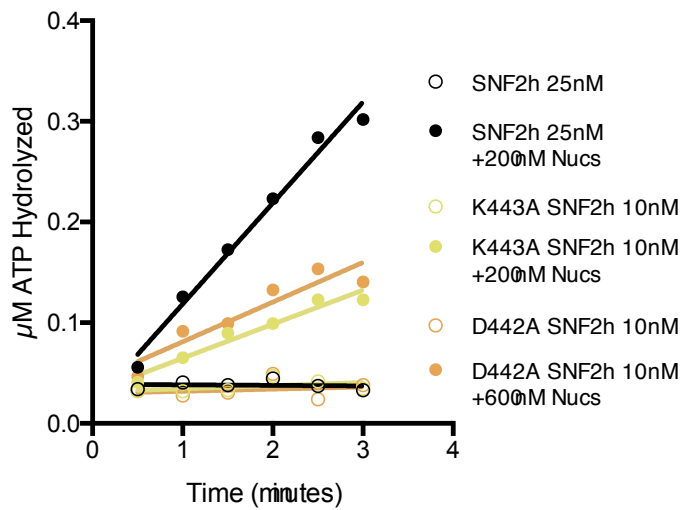**E**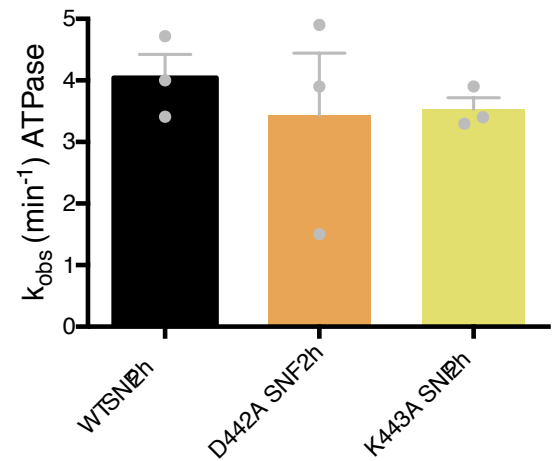

Supplement: supp [file elife-46057-supp-v1.zip › elife_poa_e46057_Figure_3_figure_supplement_5.pdf]

**A**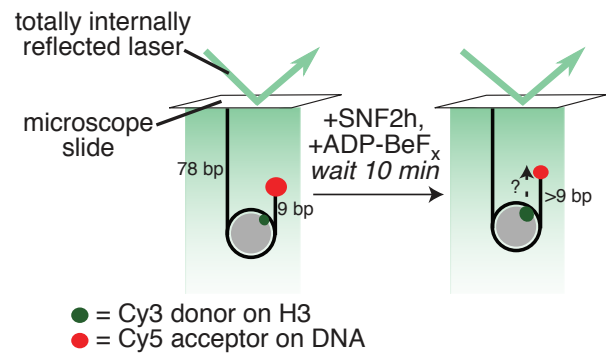**B**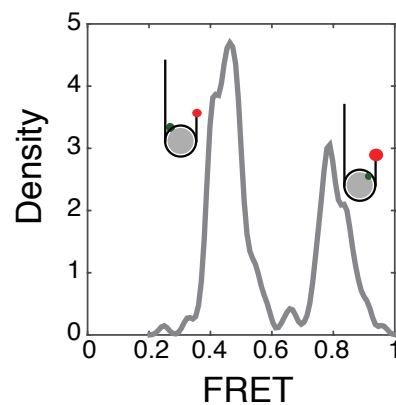**C**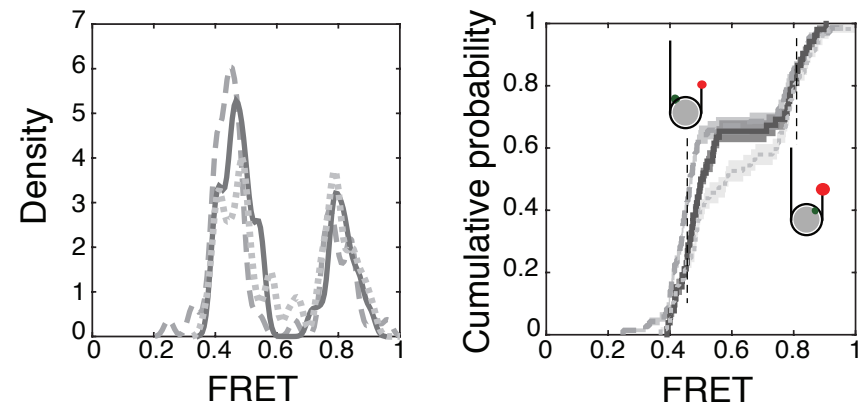**D**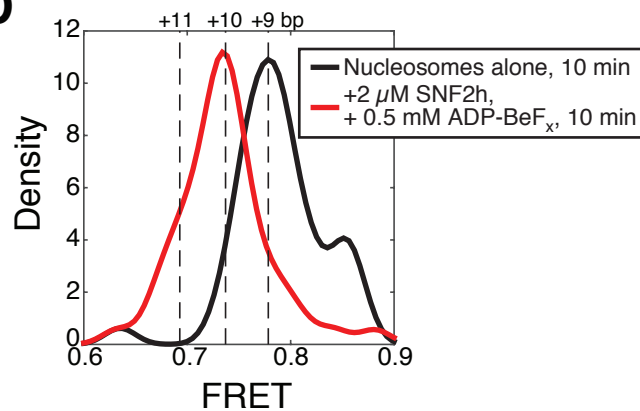**E**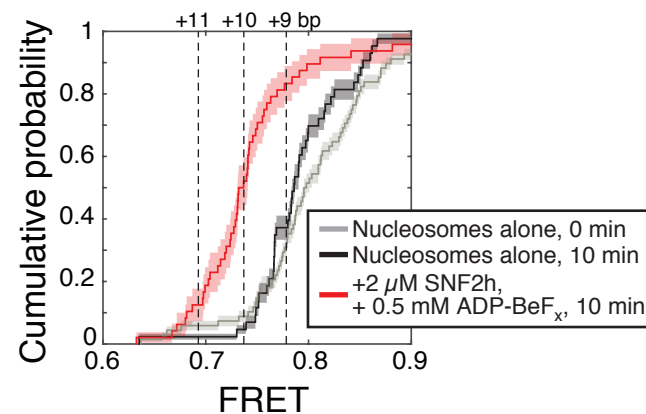**F**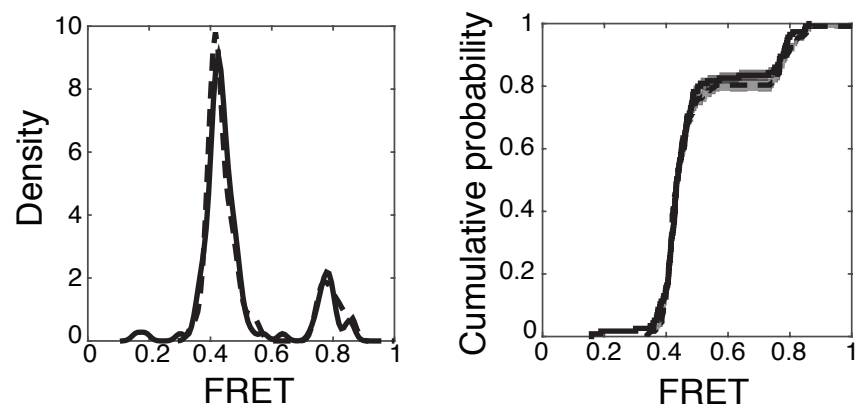**G**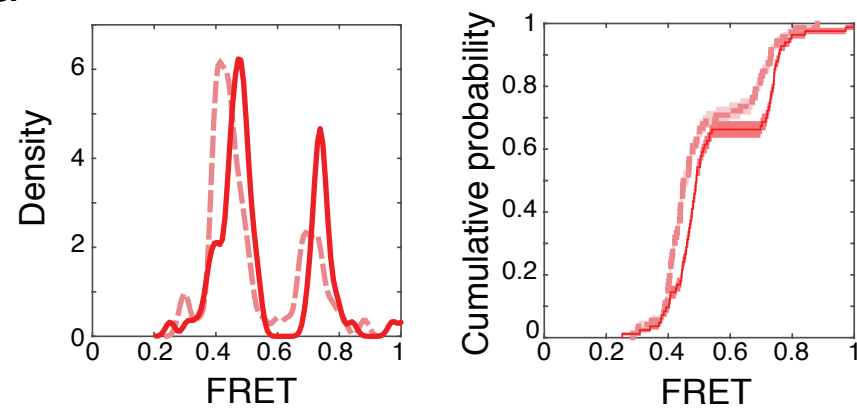

Supplement: supp [file elife-46057-supp-v1.zip › elife_poa_e46057_Figure_1_figure_supplement_4.pdf]
